# Supplementary material
Source: PubMed Central journal article supplement (PMC6854488)
Supplement: JVI.01411-19-s0001.pdf [file JVI.01411-19-s0001.pdf]

**Table S1. List of Synonymous and Nonsynonymous Mutations in r1Reovirus and r2Reovirus**

I. Synonymous mutations

| <b>Gene segment</b> | <b>r1Reovirus</b> | <b>r2Reovirus</b>          |
|---------------------|-------------------|----------------------------|
| L1                  | N/A               | N/A                        |
| L2                  | N/A               | A318G                      |
| L3                  | C2059T<br>G2062C  | C2059T<br>G2062C<br>T3550C |
| M1                  | T229C<br>C919T    | T229C<br>C919T             |
| M2                  | N/A               | N/A                        |
| M3                  | N/A               | N/A                        |
| S1                  | N/A               | N/A                        |
| S2                  | See table III     | N/A                        |
| S3                  | N/A               | N/A                        |
| S4                  | N/A               | N/A                        |

II. Non-synonymous mutations

| <b>Gene segments</b> | <b>R1Reovirus</b>                                              | <b>R2Reovirus</b> |
|----------------------|----------------------------------------------------------------|-------------------|
| L1                   | N/A                                                            | N/A               |
| L2                   | N/A                                                            | N/A               |
| L3                   | G491A (A160T)                                                  | G491A (A160T)     |
| M1                   | N/A                                                            | N/A               |
| M2                   | N/A                                                            | N/A               |
| M3                   | N/A                                                            | N/A               |
| S1                   | N/A                                                            | N/A               |
| S2                   | G1294A (after coding region)<br>See table IV                   | N/A               |
| S3                   | C508A (P161T)<br>A775G (I250V)<br>T1170G (after coding region) | A775G (I250V)     |
| S4                   | G177A (V49I)                                                   | G177A (V49I)      |

III. Synonymous mutations in r1Reovirus S2 gene segment

| <b>Mutation</b> | <b>Percentage</b> |
|-----------------|-------------------|
| G54A            | 45% A, 55% G      |
| C84T            | 64% C, 36% T      |
| C87T            | 64% C, 36% T      |
| A90G            | 64% A, 36% G      |

|        |              |
|--------|--------------|
| C91T   | 65% C, 35% G |
| T96G   | 65% T, 35% G |
| C108T  | 64% C, 35% T |
| T114C  | 33% C, 66% T |
| A123G  | 67% A, 33% G |
| A537G  | 57% A, 42% G |
| T564C  | 56% T, 44% C |
| C573T  | 59% C, 41% T |
| T834C  | 69% T, 31% C |
| C858T  | 65% C, 35% T |
| T939C  | 67% T, 33% C |
| A945G  | 55% A, 45% G |
| A951G  | 55% A, 45% G |
| G954T  | 55% G, 45% T |
| C972T  | 49% C, 51% T |
| T981C  | 51% C, 48% T |
| T990C  | 50% C, 50% T |
| A996G  | 52% A, 48% G |
| T997C  | 49% C, 51% T |
| G1005T | 48% G, 52% T |
| G1011A | 51% A, 49% G |
| A1015C | 47% A, 52% C |
| T1035C | 50% C, 49% T |
| G1044A | 45% A, 55% G |
| G1047A | 46% A, 54% G |
| T1059A | 49% A, 51% T |
| C1062T | 52% C, 48% T |
| C1068T | 51% C, 49% T |
| G1080A | 51% A, 49% G |
| G1107A | 51% A, 49% G |
| G1257A | 65% A, 35% G |
| T1274A | 65% A, 35% G |

IV. Non-synonymous mutations in r1Reovirus S2 gene segment

| <b>Mutation</b> | <b>Percentage</b> |
|-----------------|-------------------|
| G1087A (V357I)  | 51% A, 49% G      |
| C1174A (H386N)  | 54% A, 46% C      |



**Table S2. Data from screening of reovirus infectivity using the NIH Clinical Collection.** Data are shown for two independent experiments (Runs). For each run, reovirus focus forming units (FFU), number of cells (DAPI), percent infectivity ( $[\text{FFU}/\text{DAPI}] \times 100$ ), and Z-score based on percent infectivity (Z percent infectivity) were calculated. Z scores for each well were calculated using the following formula:  $Z \text{ score} = (a-b)/c$ , where a is the percent infectivity (infected cells/number of cells), b is the median percent infectivity for each plate, and c is the standard deviation of percent infectivity for each plate. The average Z-score for both runs is also provided (Avg Z % Infectivity). Name for individual compounds and their PubChem ID numbers are provided.

| NIH Clinical Collection Compound         | PUBCHEM_SID | FFU  | DAPI  | Run 1         |                 | FFU  | DAPI  | Run 2         |                 | Average |
|------------------------------------------|-------------|------|-------|---------------|-----------------|------|-------|---------------|-----------------|---------|
|                                          |             |      |       | % Infectivity | Z % Infectivity |      |       | % Infectivity | Z % Infectivity |         |
| (-)-Cotinine                             | 46386857    | 2092 | 14619 | 14.310        | 0.005           | 3200 | 15961 | 20.049        | -0.271          | -0.133  |
| (+)-cis-Diltiazem hydrochloride          | 104170056   | 3107 | 16205 | 19.173        | 0.309           | 4354 | 15018 | 28.992        | 0.386           | 0.347   |
| (+/-)-Norepinephrine hydrochloride       | 104170127   | 1659 | 16363 | 10.139        | -0.005          | 3611 | 17031 | 21.203        | 0.241           | 0.118   |
| (+/-)-Vesamicol hydrochloride            | 46386799    | 3339 | 16652 | 20.052        | 0.310           | 4220 | 15806 | 26.699        | 0.191           | 0.251   |
| 1,1-Dimethyl-4-phenylpiperazinium iodide | 46387026    | 2219 | 16640 | 13.335        | -0.168          | 3558 | 17209 | 20.675        | -0.131          | -0.149  |
| 11-Deoxycortisol                         | 46386963    | 1498 | 14406 | 10.398        | 0.015           | 3502 | 16740 | 20.920        | -0.248          | -0.116  |
| 19-Norethindrone                         | 104170074   | 1177 | 12279 | 9.585         | -0.299          | 2753 | 14090 | 19.539        | -0.381          | -0.340  |
| 19-Norethindrone acetate                 | 104170073   | 1274 | 14142 | 9.009         | -0.559          | 3688 | 17176 | 21.472        | -0.155          | -0.357  |
| 19-Nortestosterone                       | 46386764    | 3024 | 16219 | 18.645        | -0.313          | 4047 | 16035 | 25.239        | -0.309          | -0.311  |
| 2-Chloroadenosine                        | 46386960    | 2267 | 13089 | 17.320        | -0.900          | 3185 | 12461 | 25.560        | -0.199          | -0.550  |
| 2-Pyridylethylamine                      | 46386941    | 2179 | 14932 | 14.593        | -0.209          | 2770 | 13688 | 20.237        | 0.030           | -0.089  |
| 3-Pyridinemethanol                       | 46386968    | 1528 | 14392 | 10.617        | 0.370           | 3663 | 16448 | 22.270        | 0.262           | 0.316   |
| 3,5,3'-Triiodothyronine                  | 104169993   | 1862 | 16047 | 11.603        | 0.774           | 3580 | 16147 | 22.171        | 0.604           | 0.689   |
| 3'-Deoxyadenosine                        | 46386791    | 1256 | 12505 | 10.044        | 0.105           | 3503 | 16264 | 21.538        | 0.071           | 0.088   |
| 4-Phenylbutyric acid                     | 104169967   | 1360 | 14260 | 9.537         | -0.129          | 3506 | 16692 | 21.004        | -0.069          | -0.099  |
| 5-Azacytidine                            | 104170170   | 1068 | 12621 | 8.462         | -1.197          | 2646 | 14413 | 18.358        | -1.152          | -1.174  |
| 5-Fluoro-2-pyrimidone                    | 46386867    | 2219 | 16295 | 13.618        | -0.118          | 3498 | 17222 | 20.311        | -0.212          | -0.165  |
| 5-Fluorouracil                           | 104169952   | 1393 | 15561 | 8.952         | -0.590          | 3902 | 17874 | 21.831        | -0.052          | -0.321  |
| 5-Methoxytryptamine                      | 46387021    | 2778 | 14304 | 19.421        | 1.353           | 2980 | 12900 | 23.101        | 1.007           | 1.180   |
| 5-Nonyloxytryptamine hydrochloride       | 46387012    | 1645 | 13694 | 12.013        | 1.026           | 4006 | 15989 | 25.055        | 1.210           | 1.118   |
| 6-Aminoindazole                          | 46386887    | 1161 | 10946 | 10.607        | 0.146           | 3347 | 13783 | 24.284        | 0.938           | 0.542   |
| 6-Azuridine                              | 46386950    | 1040 | 11173 | 9.308         | -0.667          | 2716 | 14323 | 18.963        | -0.939          | -0.803  |
| 7-Nitroindazole                          | 46387020    | 1763 | 15869 | 11.110        | 0.461           | 3659 | 16482 | 22.200        | 0.203           | 0.332   |
| Acarbose                                 | 46386746    | 1447 | 14712 | 9.836         | -0.337          | 3456 | 16945 | 20.395        | -0.433          | -0.385  |
| Acebutolol hydrochloride                 | 104170167   | 1445 | 16437 | 8.791         | -0.721          | 3278 | 17207 | 19.050        | -0.564          | -0.643  |
| Acetazolamide                            | 104169989   | 1752 | 16398 | 10.684        | 0.285           | 3366 | 17053 | 19.738        | -0.307          | -0.011  |
| Acetylcholine chloride                   | 104170141   | 1571 | 16027 | 9.802         | -0.184          | 3568 | 17766 | 20.083        | -0.178          | -0.181  |
| Acitretin                                | 104170221   | 954  | 10320 | 9.244         | -0.429          | 3301 | 14286 | 23.107        | 0.316           | -0.057  |
| Actarit                                  | 46386663    | 2643 | 14689 | 17.993        | 0.891           | 2509 | 12093 | 20.748        | 0.204           | 0.548   |
| Acyclovir                                | 104170215   | 905  | 10133 | 8.931         | -0.601          | 2921 | 14335 | 20.377        | -0.470          | -0.536  |
| Albendazole                              | 104170113   | 484  | 8774  | 5.516         | -2.463          | 1068 | 7911  | 13.500        | -2.642          | -2.552  |
| Alfuzosin                                | 46386655    | 3397 | 16737 | 20.296        | 1.636           | 3240 | 15149 | 21.388        | 0.423           | 1.030   |
| Allopurinol                              | 104169990   | 1633 | 16071 | 10.161        | 0.007           | 3382 | 16760 | 20.179        | -0.142          | -0.067  |
| Alosetron monohydrochloride              | 46386816    | 2464 | 16744 | 14.716        | 0.077           | 3661 | 17270 | 21.199        | -0.015          | 0.031   |
| Alprazolam                               | 46386679    | 2743 | 17640 | 15.550        | 0.101           | 3182 | 15667 | 20.310        | 0.055           | 0.078   |
| Altanserin hydrochloride                 | 46386989    | 2605 | 14086 | 18.494        | 1.053           | 3286 | 13124 | 25.038        | 1.667           | 1.360   |
| Altretamine                              | 104170093   | 1306 | 13484 | 9.686         | -0.188          | 3732 | 17032 | 21.912        | -0.028          | -0.108  |
| AM 404                                   | 46386792    | 2469 | 16885 | 14.622        | 0.060           | 3562 | 17168 | 20.748        | -0.115          | -0.027  |
| AM-251                                   | 46386990    | 1984 | 16774 | 11.828        | -1.104          | 2334 | 15171 | 15.385        | -1.624          | -1.364  |
| Amcinonide                               | 104170128   | 3267 | 14451 | 22.607        | 1.414           | 4510 | 13593 | 33.179        | 1.388           | 1.401   |
| Amiloride hydrochloride hydrate          | 46386846    | 3060 | 15899 | 19.246        | -0.047          | 4085 | 15815 | 25.830        | -0.106          | -0.077  |
| Aminoglutethimide                        | 104170212   | 1002 | 10174 | 9.849         | -0.098          | 3105 | 14534 | 21.364        | -0.186          | -0.142  |
| Aminolevulinic acid                      | 104170099   | 1390 | 14612 | 9.513         | -0.140          | 3655 | 17987 | 20.320        | -0.248          | -0.194  |
| Amiodarone hydrochloride                 | 46386662    | 2513 | 16544 | 15.190        | -1.204          | 4683 | 16432 | 28.499        | 0.374           | -0.415  |
| Amisulpride                              | 46386656    | 2531 | 17520 | 14.446        | -0.256          | 3143 | 15592 | 20.158        | 0.003           | -0.126  |
| Amitriptyline hydrochloride              | 104169995   | 1440 | 16507 | 8.724         | -0.757          | 3353 | 17749 | 18.891        | -0.624          | -0.690  |
| Amlexanox                                | 46386726    | 3055 | 17095 | 17.871        | 0.852           | 3362 | 16587 | 20.269        | 0.041           | 0.446   |
| Amlodipine                               | 46386686    | 2279 | 14338 | 15.895        | 0.212           | 2772 | 13174 | 21.041        | 0.305           | 0.258   |
| Amoxapine                                | 104170044   | 2879 | 16193 | 17.779        | -0.140          | 3826 | 14489 | 26.406        | -0.233          | -0.187  |
| Amoxicillin                              | 104170168   | 1771 | 16419 | 10.786        | 0.340           | 3624 | 17607 | 20.583        | 0.009           | 0.175   |
| Ampicillin sodium                        | 104170166   | 1056 | 11444 | 9.228         | -0.718          | 2966 | 14616 | 20.293        | -0.469          | -0.593  |
| Amproxicam                               | 46386688    | 2512 | 17079 | 14.708        | -0.172          | 3211 | 16208 | 19.811        | -0.115          | -0.143  |
| Anagrelide hydrochloride                 | 46386622    | 3502 | 17613 | 19.883        | 0.235           | 4408 | 17653 | 24.970        | -0.401          | -0.083  |
| Anastrozole                              | 46386543    | 1281 | 12092 | 10.594        | 0.359           | 3381 | 15069 | 22.437        | 0.306           | 0.333   |
| Argatroban                               | 46386718    | 3127 | 17578 | 17.789        | -0.368          | 4230 | 16168 | 26.163        | -0.327          | -0.348  |
| Aripiprazole                             | 46386763    | 3374 | 16153 | 20.888        | 1.828           | 2953 | 13592 | 21.726        | 0.538           | 1.183   |
| Artemether                               | 46386824    | 3342 | 16282 | 20.526        | 0.513           | 4541 | 16200 | 28.031        | 0.233           | 0.373   |
| Artesunate                               | 46386645    | 1865 | 14061 | 13.264        | -0.639          | 2496 | 12456 | 20.039        | -0.037          | -0.338  |
| Atenolol                                 | 104170046   | 2987 | 16684 | 17.903        | -0.100          | 4145 | 16129 | 25.699        | -0.403          | -0.251  |
| Atomoxetine hydrochloride                | 46386643    | 1283 | 11505 | 11.152        | 0.487           | 3432 | 14268 | 24.054        | 0.857           | 0.672   |
| Atracurium besylate                      | 46386822    | 1026 | 10767 | 9.529         | -0.132          | 3051 | 14760 | 20.671        | -0.156          | -0.144  |
| Atropine                                 | 104169991   | 1559 | 13940 | 11.184        | 0.507           | 3696 | 16519 | 22.374        | 0.265           | 0.386   |
| Azasetron hydrochloride                  | 46386991    | 3040 | 17554 | 17.318        | 0.673           | 2926 | 15495 | 18.884        | -0.431          | 0.121   |
| Azathioprine                             | 104170112   | 870  | 14394 | 6.044         | -2.183          | 2895 | 17371 | 16.666        | -1.539          | -1.861  |
| Azelastine hydrochloride                 | 46386661    | 3778 | 13401 | 28.192        | 2.981           | 4751 | 11858 | 40.066        | 3.846           | 3.413   |
| Azithromycin                             | 104170210   | 55   | 11373 | 0.484         | -6.193          | 518  | 12392 | 4.180         | -6.153          | -6.173  |
| Balsalazide                              | 46386828    | 1535 | 15218 | 10.087        | 0.125           | 3716 | 17221 | 21.578        | 0.081           | 0.103   |
| Beclomethasone                           | 46386972    | 3160 | 13887 | 22.755        | 1.231           | 4515 | 15021 | 30.058        | 0.842           | 1.036   |
| Beclomethasone dipropionate              | 104170108   | 3182 | 14839 | 21.443        | 1.040           | 4222 | 13242 | 31.883        | 1.078           | 1.059   |
| Benactyzine hydrochloride                | 46386942    | 3309 | 17489 | 18.920        | -0.003          | 4448 | 16582 | 26.824        | -0.129          | -0.066  |
| Benazepril hydrochloride                 | 46386692    | 2940 | 16178 | 18.173        | -0.244          | 4057 | 15388 | 26.365        | -0.267          | -0.255  |
| Bendroflumazide                          | 104170162   | 3170 | 16732 | 18.946        | 0.235           | 4297 | 15310 | 28.067        | 0.164           | 0.200   |
| Benidipine hydrochloride                 | 46386729    | 2208 | 14915 | 14.804        | 0.092           | 3638 | 15555 | 23.388        | 0.473           | 0.283   |
| Benproperine phosphate                   | 46386752    | 2243 | 16122 | 13.913        | 2.216           | 4376 | 15509 | 28.216        | 2.325           | 2.271   |
| Benzbromarone                            | 46386951    | 3152 | 16921 | 18.628        | 1.097           | 2618 | 13747 | 19.044        | -0.376          | 0.360   |
| Benztropine mesylate                     | 104170144   | 1703 | 15721 | 10.833        | 0.287           | 3770 | 17371 | 21.703        | 0.028           | 0.158   |
| Benzylimidazole                          | 46386891    | 1442 | 14198 | 10.156        | -0.136          | 3305 | 16286 | 20.294        | -0.469          | -0.303  |
| Bestatin                                 | 46386830    | 2914 | 15718 | 18.539        | -0.126          | 4054 | 15459 | 26.224        | -0.309          | -0.218  |
| Beta-estradiol                           | 46386902    | 3056 | 16697 | 18.303        | -0.465          | 3985 | 16184 | 24.623        | -0.520          | -0.492  |
| Betamethasone                            | 104170205   | 1133 | 10531 | 10.759        | 0.400           | 3346 | 13406 | 24.959        | 0.849           | 0.625   |
| Betaxolol hydrochloride                  | 46386993    | 2129 | 16847 | 12.637        | -0.291          | 3535 | 17047 | 20.737        | -0.117          | -0.204  |
| Bethanechol chloride                     | 104170158   | 1559 | 14692 | 10.611        | 0.149           | 3558 | 16932 | 21.013        | -0.215          | -0.033  |
| Bicalutamide                             | 46386630    | 970  | 9739  | 9.960         | 0.066           | 3255 | 15632 | 20.823        | -0.117          | -0.025  |
| Bifemelane hydrochloride                 | 46386922    | 4125 | 17521 | 23.543        | 1.856           | 5491 | 17516 | 31.348        | 1.784           | 1.820   |

|                              |           |      |       |        |        |      |       |        |        |        |
|------------------------------|-----------|------|-------|--------|--------|------|-------|--------|--------|--------|
| Bifonazole                   | 46386787  | 3431 | 17251 | 19.889 | 0.238  | 4032 | 16535 | 24.385 | -0.601 | -0.182 |
| Bisoprolol fumarate          | 46386635  | 2729 | 17483 | 15.609 | 0.120  | 2583 | 14978 | 17.245 | -0.990 | -0.435 |
| Brimonidine                  | 104170136 | 3024 | 17114 | 17.670 | -0.175 | 4313 | 15407 | 27.994 | 0.147  | -0.014 |
| Brucine                      | 46386939  | 3349 | 17186 | 19.487 | 0.179  | 4329 | 15792 | 27.413 | 0.048  | 0.113  |
| Budesonide                   | 104170124 | 1515 | 13731 | 11.033 | 0.413  | 3659 | 15160 | 24.136 | 0.886  | 0.650  |
| Buflomedil hydrochloride     | 46386737  | 2377 | 16676 | 14.254 | -0.005 | 3641 | 16946 | 21.486 | 0.049  | 0.022  |
| Bumetanide                   | 104170048 | 1770 | 15917 | 11.120 | 0.467  | 3393 | 15858 | 21.396 | -0.080 | 0.194  |
| Bupropion hydrochloride      | 46386703  | 2495 | 13648 | 18.281 | -0.209 | 3130 | 11501 | 27.215 | -0.012 | -0.110 |
| Buspirone hydrochloride      | 104170171 | 1776 | 15931 | 11.148 | 0.485  | 4130 | 17529 | 23.561 | 0.683  | 0.584  |
| Busulfan                     | 104169996 | 1776 | 16484 | 10.774 | 0.333  | 3239 | 16257 | 19.924 | -0.237 | 0.048  |
| Calcipotriol                 | 46386727  | 3168 | 15943 | 19.871 | 0.302  | 4427 | 15457 | 28.641 | 0.416  | 0.359  |
| Calcitriol                   | 46386784  | 2140 | 16933 | 12.638 | -0.291 | 3475 | 15830 | 21.952 | 0.153  | -0.069 |
| Captopril                    | 104170052 | 1649 | 16012 | 10.299 | -0.047 | 3859 | 17280 | 22.332 | 0.250  | 0.101  |
| Carbamazepine                | 104170177 | 1420 | 14442 | 9.832  | -0.339 | 3450 | 16689 | 20.672 | -0.335 | -0.337 |
| Carbidopa                    | 104170225 | 1579 | 14418 | 10.952 | 0.506  | 4092 | 17858 | 22.914 | 0.260  | 0.383  |
| Carinoxamine maleate         | 104170100 | 3120 | 17319 | 18.015 | -0.064 | 3891 | 14868 | 26.170 | -0.290 | -0.177 |
| Carisoprodol                 | 104170000 | 2536 | 13797 | 18.381 | 0.054  | 3564 | 12989 | 27.439 | 0.014  | 0.034  |
| Carmofur                     | 46386675  | 3031 | 17357 | 17.463 | -0.473 | 4247 | 16313 | 26.034 | -0.366 | -0.419 |
| Carvedilol                   | 46386749  | 1683 | 16972 | 9.916  | -0.123 | 3381 | 17973 | 18.812 | -0.654 | -0.388 |
| CCPA                         | 46386935  | 1369 | 13492 | 10.147 | 0.153  | 3484 | 16159 | 21.561 | 0.077  | 0.115  |
| Cefaclor                     | 46386958  | 3056 | 16843 | 18.144 | -0.253 | 4090 | 15671 | 26.099 | -0.347 | -0.300 |
| Cefatrizine propylene glycol | 46386659  | 2516 | 17111 | 14.704 | -0.173 | 3314 | 15918 | 20.819 | 0.229  | 0.028  |
| Cefazolin sodium             | 104170051 | 3147 | 17389 | 18.098 | -0.038 | 4073 | 15037 | 27.087 | -0.071 | -0.054 |
| Cefdinir                     | 46386833  | 3194 | 17261 | 18.504 | -0.137 | 4158 | 16112 | 25.807 | -0.434 | -0.286 |
| Cefixime trihydrate          | 46386832  | 1350 | 14079 | 9.589  | -0.105 | 3085 | 16988 | 18.160 | -0.814 | -0.459 |
| Cefotaxime sodium            | 104170202 | 1872 | 15999 | 11.701 | 0.826  | 3701 | 16953 | 21.831 | 0.477  | 0.651  |
| Cefoxitin sodium             | 104170054 | 3043 | 17342 | 17.547 | -0.215 | 3736 | 14122 | 26.455 | -0.222 | -0.218 |
| Cefpodoxime proxetil         | 46386731  | 2403 | 13373 | 17.969 | -0.310 | 3332 | 11873 | 28.064 | 0.243  | -0.033 |
| Cefuroxime                   | 104170159 | 1604 | 16606 | 9.659  | -0.260 | 3554 | 17862 | 19.897 | -0.247 | -0.253 |
| Celecoxib                    | 104170206 | 1297 | 12844 | 10.098 | -0.026 | 2932 | 14299 | 20.505 | -0.020 | -0.023 |
| Cephalexin hydrate           | 46386774  | 2743 | 14890 | 18.422 | 1.030  | 2613 | 12636 | 20.679 | 0.181  | 0.605  |
| Cerivastatin sodium          | 46386572  | 2730 | 14795 | 18.452 | 1.040  | 3607 | 14140 | 25.509 | 1.828  | 1.434  |
| Cetirizine                   | 104170194 | 1550 | 14739 | 10.516 | 0.268  | 3597 | 16533 | 21.756 | -0.073 | 0.097  |
| Cetiraxate hydrochloride     | 46386678  | 3337 | 17467 | 19.105 | -0.110 | 4528 | 17700 | 25.582 | -0.191 | -0.150 |
| CGS 12066B dimaleate         | 46386975  | 951  | 11692 | 8.134  | -0.776 | 2858 | 14617 | 19.553 | -0.449 | -0.613 |
| CGS 15943                    | 46386800  | 2738 | 15750 | 17.384 | 0.549  | 4190 | 16031 | 26.137 | 1.085  | 0.817  |
| Chlorambucil                 | 104170053 | 1093 | 10543 | 10.367 | -0.004 | 2915 | 13474 | 21.634 | 0.004  | 0.000  |
| Chloramphenicol              | 104170151 | 1375 | 14287 | 9.624  | -0.469 | 3640 | 16341 | 22.275 | 0.230  | -0.120 |
| Chlordiazepoxide             | 46386831  | 1464 | 14960 | 9.786  | -0.014 | 3443 | 17023 | 20.226 | -0.273 | -0.143 |
| Chlorothiazide               | 104169998 | 3207 | 16805 | 19.084 | 0.280  | 4410 | 15973 | 27.609 | 0.055  | 0.167  |
| Chloroxine                   | 104170003 | 3065 | 17408 | 17.607 | -0.196 | 4374 | 15169 | 28.835 | 0.348  | 0.076  |
| Chlorpheniramine maleate     | 46386872  | 2507 | 13409 | 18.696 | -0.291 | 3321 | 12824 | 25.897 | -0.083 | -0.187 |
| Chlorpromazine hydrochloride | 104170050 | 2884 | 17420 | 16.556 | -0.534 | 4155 | 15372 | 27.030 | -0.084 | -0.309 |
| Chlorpropamide               | 104170001 | 3149 | 17627 | 17.865 | -0.113 | 3913 | 14732 | 26.561 | -0.196 | -0.154 |
| Chlorthalidone               | 104170188 | 1536 | 14969 | 10.261 | 0.061  | 3657 | 17498 | 20.900 | 0.128  | 0.094  |
| Chlorzoxazone                | 104169997 | 1684 | 16393 | 10.273 | 0.067  | 3452 | 17737 | 19.462 | -0.410 | -0.172 |
| Cilastatin sodium            | 46386570  | 2313 | 12905 | 17.923 | -0.633 | 3365 | 12637 | 26.628 | 0.167  | -0.233 |
| Cimetidine                   | 104169999 | 2897 | 16824 | 17.219 | -0.320 | 4107 | 15440 | 26.600 | -0.187 | -0.254 |
| Cinanserin                   | 46386801  | 2134 | 16797 | 12.705 | -0.279 | 3593 | 17211 | 20.876 | -0.086 | -0.183 |
| Cisapride hydrate            | 46386802  | 3272 | 16478 | 19.857 | 0.986  | 4886 | 16227 | 30.110 | 1.970  | 1.478  |
| Citalopram hydrobromide      | 46386617  | 2676 | 17052 | 15.693 | 0.147  | 3156 | 15317 | 20.605 | 0.156  | 0.151  |
| Cladribine                   | 46386544  | 1238 | 11082 | 11.171 | 0.625  | 3151 | 12712 | 24.788 | 0.922  | 0.774  |
| Clarithromycin               | 46386761  | 3430 | 17486 | 19.616 | 1.416  | 2951 | 15049 | 19.609 | -0.184 | 0.616  |
| Clobenpropit                 | 46387016  | 1784 | 15566 | 11.461 | 0.681  | 4020 | 17074 | 23.545 | 0.678  | 0.679  |
| Clobetasol propionate        | 104170049 | 2938 | 12290 | 23.906 | 1.832  | 4085 | 11736 | 34.807 | 1.777  | 1.805  |
| Clofazimine                  | 46386952  | 1374 | 17415 | 7.890  | -2.378 | 2633 | 15552 | 16.930 | -1.097 | -1.737 |
| Clomifene citrate            | 104170129 | 1460 | 14973 | 9.751  | -0.030 | 3482 | 16993 | 20.491 | -0.204 | -0.117 |
| Clomipramine hydrochloride   | 104170176 | 1366 | 16638 | 8.210  | -1.355 | 3257 | 17114 | 19.031 | -0.914 | -1.135 |
| Clonidine hydrochloride      | 46386982  | 2458 | 17215 | 14.278 | -0.311 | 3211 | 15335 | 20.939 | 0.270  | -0.021 |
| Clopidogrel                  | 104170201 | 1572 | 14846 | 10.589 | 0.307  | 4158 | 17457 | 23.819 | 0.521  | 0.414  |
| Clotrimazole                 | 46386926  | 2589 | 15415 | 16.795 | 0.445  | 3692 | 15751 | 23.440 | 0.485  | 0.465  |
| Clozapine                    | 104170165 | 1340 | 16070 | 8.339  | -0.962 | 3089 | 17233 | 17.925 | -0.986 | -0.974 |
| Corticosterone               | 46386953  | 1503 | 14044 | 10.702 | 0.409  | 3879 | 16504 | 23.503 | 0.585  | 0.497  |
| Cortisol 21-acetate          | 104169955 | 1630 | 13483 | 12.089 | 1.130  | 4333 | 16111 | 26.895 | 1.407  | 1.268  |
| Cortisone                    | 46386956  | 1629 | 14796 | 11.010 | 0.398  | 3550 | 16827 | 21.097 | -0.186 | 0.106  |
| Cortisone acetate            | 104170175 | 3352 | 17454 | 19.205 | 0.319  | 4230 | 15541 | 27.218 | -0.039 | 0.140  |
| Cromolyn sodium              | 104170109 | 1448 | 15286 | 9.473  | -0.359 | 3533 | 17333 | 20.383 | -0.065 | -0.212 |
| Crotamiton                   | 46386684  | 1410 | 14323 | 9.844  | 0.013  | 3557 | 17398 | 20.445 | -0.216 | -0.101 |
| Cyclophosphamide hydrate     | 104170160 | 1140 | 11239 | 10.143 | -0.144 | 3017 | 14614 | 20.645 | -0.345 | -0.245 |
| Cyproheptadine hydrochloride | 46386957  | 1300 | 14714 | 8.835  | -0.453 | 3125 | 16790 | 18.612 | -0.696 | -0.574 |
| Cytarabine                   | 46386862  | 2937 | 12310 | 23.859 | 1.996  | 3890 | 11800 | 32.966 | 2.338  | 2.167  |
| D-Cycloserine                | 46386864  | 2524 | 17723 | 14.241 | -0.323 | 3326 | 16769 | 19.834 | -0.107 | -0.215 |
| Dactinomycin                 | 46386883  | 2733 | 10907 | 25.057 | 3.177  | 3325 | 10282 | 32.338 | 4.156  | 3.666  |
| Danazol                      | 104170055 | 3254 | 17310 | 18.798 | 0.188  | 4162 | 15212 | 27.360 | -0.005 | 0.091  |
| Dantrolene sodium            | 104170142 | 1448 | 14619 | 9.905  | -0.294 | 3526 | 16859 | 20.915 | -0.250 | -0.272 |
| Dapsone                      | 104169986 | 1193 | 11146 | 10.703 | 0.206  | 3352 | 14554 | 23.031 | 0.497  | 0.352  |
| Daunorubicin hydrochloride   | 104170197 | 295  | 3477  | 8.484  | -0.846 | 1709 | 8981  | 19.029 | -0.858 | -0.852 |
| Deferiprone                  | 46386865  | 1347 | 14070 | 9.574  | -0.112 | 3717 | 17468 | 21.279 | 0.003  | -0.055 |
| Dehydrocholic acid           | 46386890  | 1035 | 11407 | 9.073  | -0.814 | 2962 | 14676 | 20.183 | -0.508 | -0.661 |
| Dehydroepiandrosterone       | 46387028  | 1510 | 15183 | 9.945  | -0.268 | 3858 | 17234 | 22.386 | 0.269  | 0.000  |
| Demeclocycline               | 104170101 | 1464 | 15273 | 9.586  | -0.106 | 3596 | 16933 | 21.237 | -0.008 | -0.057 |
| Desipramine hydrochloride    | 104170179 | 1614 | 16281 | 9.913  | -0.124 | 3421 | 17928 | 19.082 | -0.552 | -0.338 |
| Desloratadine                | 46386563  | 1572 | 16636 | 9.449  | -1.873 | 1978 | 15801 | 12.518 | -2.601 | -2.237 |
| Desoximetasone               | 46386959  | 1489 | 11217 | 13.274 | 1.596  | 3483 | 13457 | 25.882 | 1.208  | 1.402  |
| Dexamethasone                | 104170143 | 1242 | 10381 | 11.964 | 1.061  | 3382 | 13511 | 25.031 | 0.870  | 0.966  |
| Dexbrompheniramine maleate   | 46386574  | 2673 | 13675 | 19.547 | 0.086  | 3386 | 12781 | 26.492 | 0.121  | 0.103  |

|                                            |           |      |       |        |        |      |       |        |        |        |
|--------------------------------------------|-----------|------|-------|--------|--------|------|-------|--------|--------|--------|
| Dexchlorpheniramine maleate                | 46386575  | 2309 | 17006 | 13.578 | -0.125 | 3806 | 17303 | 21.996 | 0.163  | 0.019  |
| Dextromethorphan hydrobromide, monohydrate | 46386932  | 2575 | 16933 | 15.207 | 0.164  | 3849 | 17054 | 22.569 | 0.291  | 0.227  |
| Dextrorphan D-tartrate                     | 46386873  | 3461 | 17451 | 19.833 | 0.213  | 4283 | 16430 | 26.068 | -0.025 | 0.094  |
| Diazepam                                   | 46386554  | 2984 | 15856 | 18.819 | -0.036 | 3956 | 14390 | 27.491 | 0.071  | 0.018  |
| Diazoxide                                  | 46386946  | 1462 | 14515 | 10.072 | 0.118  | 3515 | 16613 | 21.158 | -0.029 | 0.045  |
| Dichloroacetic acid                        | 46386944  | 2875 | 16028 | 17.937 | -0.320 | 4056 | 15333 | 26.453 | -0.240 | -0.280 |
| Diclofenac sodium                          | 46386927  | 2173 | 13442 | 16.166 | -0.890 | 3133 | 11768 | 26.623 | -0.189 | -0.540 |
| Dicloxacillin sodium                       | 104170195 | 1696 | 15265 | 11.110 | 0.512  | 3672 | 17054 | 21.532 | 0.364  | 0.438  |
| Dicyclomine hydrochloride                  | 104170002 | 3830 | 16902 | 22.660 | 1.431  | 4946 | 15477 | 31.957 | 1.095  | 1.263  |
| Didanosine                                 | 46386730  | 2428 | 17477 | 13.893 | -0.435 | 3005 | 15755 | 19.073 | -0.366 | -0.401 |
| Diflunisal                                 | 104170004 | 887  | 10836 | 8.186  | -1.010 | 2974 | 14925 | 19.926 | -0.600 | -0.805 |
| Digoxin                                    | 104170057 | 8    | 9479  | 0.084  | -4.491 | 91   | 11121 | 0.818  | -5.355 | -4.923 |
| Dihydroxidine hydrochloride                | 46386992  | 1835 | 15030 | 12.209 | -0.980 | 2264 | 12980 | 17.442 | -0.922 | -0.951 |
| Dilantin                                   | 104170140 | 1673 | 16048 | 10.425 | 0.032  | 3742 | 17333 | 21.589 | -0.012 | 0.010  |
| Diphenhydramine hydrochloride              | 46386874  | 1146 | 11920 | 9.614  | -0.284 | 3108 | 14750 | 21.071 | 0.192  | -0.046 |
| Diphenoxylate hydrochloride                | 46386550  | 3354 | 17418 | 19.256 | -0.043 | 4320 | 16527 | 26.139 | 0.000  | -0.022 |
| Diphenylcyclopropenone                     | 46386897  | 897  | 12100 | 7.413  | -1.109 | 2547 | 14627 | 17.413 | -1.010 | -1.059 |
| Dipyridamole                               | 104169946 | 1080 | 11181 | 9.659  | -0.447 | 3118 | 13799 | 22.596 | 0.343  | -0.052 |
| Disopyramide phosphate                     | 104170181 | 2940 | 17322 | 16.973 | -0.400 | 4028 | 14899 | 27.035 | -0.083 | -0.241 |
| Disulfiram                                 | 46386898  | 3726 | 17283 | 21.559 | 0.977  | 4364 | 16666 | 26.185 | 0.015  | 0.496  |
| DL-Penicillamine                           | 104169974 | 1634 | 15850 | 10.309 | 0.154  | 3854 | 17415 | 22.130 | 0.035  | 0.094  |
| DMSO-Mock                                  |           | 2    | 14457 | 0.014  | -8.566 | 1    | 14359 | 0.007  | -8.952 | -8.759 |
| DMSO-Mock                                  |           | 3    | 13247 | 0.023  | -8.562 | 1    | 12778 | 0.008  | -8.952 | -8.757 |
| DMSO-Mock                                  |           | 5    | 14722 | 0.034  | -8.557 | 1    | 14374 | 0.007  | -8.952 | -8.754 |
| DMSO-Mock                                  |           | 5    | 14419 | 0.035  | -8.557 | 36   | 14237 | 0.253  | -8.868 | -8.712 |
| DMSO-Mock                                  |           | 1    | 12425 | 0.008  | -6.490 | 1    | 15209 | 0.007  | -7.625 | -7.058 |
| DMSO-Mock                                  |           | 1    | 12211 | 0.008  | -6.490 | 0    | 15649 | 0.000  | -7.627 | -7.059 |
| DMSO-Mock                                  |           | 2    | 11906 | 0.017  | -6.485 | 5    | 15134 | 0.033  | -7.615 | -7.050 |
| DMSO-Mock                                  |           | 2    | 10999 | 0.018  | -6.484 | 12   | 14125 | 0.085  | -7.597 | -7.041 |
| DMSO-Mock                                  |           | 0    | 14066 | 0.000  | -6.093 | 1    | 14360 | 0.007  | -8.180 | -7.136 |
| DMSO-Mock                                  |           | 1    | 14197 | 0.007  | -6.091 | 2    | 14389 | 0.014  | -8.178 | -7.134 |
| DMSO-Mock                                  |           | 1    | 12684 | 0.008  | -6.090 | 2    | 11909 | 0.017  | -8.177 | -7.134 |
| DMSO-Mock                                  |           | 5    | 14111 | 0.035  | -6.081 | 16   | 13150 | 0.122  | -8.145 | -7.113 |
| DMSO-Mock                                  |           | 0    | 14413 | 0.000  | -5.864 | 0    | 13412 | 0.000  | -6.553 | -6.209 |
| DMSO-Mock                                  |           | 1    | 14919 | 0.007  | -5.862 | 2    | 14404 | 0.014  | -6.550 | -6.206 |
| DMSO-Mock                                  |           | 1    | 13620 | 0.007  | -5.862 | 2    | 13294 | 0.015  | -6.550 | -6.206 |
| DMSO-Mock                                  |           | 2    | 14500 | 0.014  | -5.860 | 2    | 13610 | 0.015  | -6.550 | -6.205 |
| DMSO-Mock                                  |           | 0    | 10665 | 0.000  | -5.495 | 0    | 15530 | 0.000  | -6.338 | -5.917 |
| DMSO-Mock                                  |           | 1    | 8725  | 0.011  | -5.489 | 3    | 15252 | 0.020  | -6.332 | -5.911 |
| DMSO-Mock                                  |           | 2    | 8614  | 0.023  | -5.482 | 1    | 15372 | 0.007  | -6.336 | -5.909 |
| DMSO-Mock                                  |           | 4    | 1857  | 0.215  | -5.377 | 0    | 13851 | 0.000  | -6.338 | -5.858 |
| DMSO-Mock                                  |           | 0    | 14906 | 0.000  | -4.930 | 4    | 13249 | 0.030  | -6.859 | -5.895 |
| DMSO-Mock                                  |           | 0    | 15148 | 0.000  | -4.930 | 1    | 14738 | 0.007  | -6.867 | -5.899 |
| DMSO-Mock                                  |           | 0    | 14200 | 0.000  | -4.930 | 0    | 12652 | 0.000  | -6.869 | -5.900 |
| DMSO-Mock                                  |           | 1    | 15221 | 0.007  | -4.928 | 11   | 13302 | 0.083  | -6.841 | -5.885 |
| DMSO-Mock                                  |           | 0    | 12060 | 0.000  | -4.530 | 17   | 15361 | 0.111  | -5.541 | -5.035 |
| DMSO-Mock                                  |           | 2    | 11643 | 0.017  | -4.522 | 12   | 15262 | 0.079  | -5.549 | -5.036 |
| DMSO-Mock                                  |           | 5    | 13226 | 0.038  | -4.512 | 0    | 14479 | 0.000  | -5.570 | -5.041 |
| DMSO-Mock                                  |           | 9    | 12277 | 0.073  | -4.496 | 20   | 15109 | 0.132  | -5.535 | -5.016 |
| DMSO-Mock                                  |           | 0    | 15208 | 0.000  | -2.527 | 39   | 16632 | 0.234  | -4.684 | -3.605 |
| DMSO-Mock                                  |           | 6    | 17101 | 0.035  | -2.521 | 22   | 16309 | 0.135  | -4.706 | -3.613 |
| DMSO-Mock                                  |           | 6    | 15091 | 0.040  | -2.520 | 1    | 15474 | 0.006  | -4.734 | -3.627 |
| DMSO-Mock                                  |           | 7    | 14972 | 0.047  | -2.519 | 2    | 16570 | 0.012  | -4.733 | -3.626 |
| DMSO-Mock                                  |           | 1036 | 13721 | 7.550  | -1.381 | 1    | 15076 | 0.007  | -7.692 | -4.537 |
| DMSO-Mock                                  |           | 1121 | 13450 | 8.335  | -0.964 | 1    | 15610 | 0.006  | -7.693 | -4.328 |
| DMSO-Mock                                  |           | 1131 | 12664 | 8.931  | -0.647 | 0    | 14503 | 0.000  | -7.695 | -4.171 |
| DMSO-Mock                                  |           | 1274 | 13302 | 9.578  | -0.303 | 6    | 15538 | 0.039  | -7.680 | -3.992 |
| DMSO-Reo                                   |           | 2551 | 13648 | 18.691 | -0.293 | 1528 | 5124  | 29.820 | 1.261  | 0.484  |
| DMSO-Reo                                   |           | 1086 | 11366 | 9.555  | -0.259 | 2891 | 14485 | 19.959 | -0.591 | -0.425 |
| DMSO-Reo                                   |           | 1190 | 11782 | 10.100 | -0.171 | 3214 | 14386 | 22.341 | 0.253  | 0.041  |
| DMSO-Reo                                   |           | 1164 | 11845 | 9.827  | -0.110 | 3093 | 14903 | 20.754 | -0.362 | -0.236 |
| DMSO-Reo                                   |           | 1064 | 11042 | 9.636  | -0.083 | 3319 | 15035 | 22.075 | 0.211  | 0.064  |
| DMSO-Reo                                   |           | 2671 | 13829 | 19.314 | -0.017 | 1347 | 4411  | 30.537 | 1.506  | 0.745  |
| DMSO-Reo                                   |           | 2128 | 14603 | 14.572 | 0.051  | 3447 | 15907 | 21.670 | 0.090  | 0.071  |
| DMSO-Reo                                   |           | 2679 | 13721 | 19.525 | 0.076  | 1549 | 4856  | 31.899 | 1.973  | 1.025  |
| DMSO-Reo                                   |           | 2072 | 14047 | 14.750 | 0.083  | 3352 | 15730 | 21.310 | 0.010  | 0.047  |
| DMSO-Reo                                   |           | 2560 | 13207 | 19.384 | 0.146  | 3440 | 12393 | 27.758 | 0.151  | 0.148  |
| DMSO-Reo                                   |           | 2335 | 11861 | 19.686 | 0.148  | 1197 | 3513  | 34.073 | 2.718  | 1.433  |
| DMSO-Reo                                   |           | 2255 | 14693 | 15.347 | 0.189  | 3267 | 15721 | 20.781 | -0.108 | 0.041  |
| DMSO-Reo                                   |           | 2626 | 13964 | 18.805 | 0.190  | 3160 | 11272 | 28.034 | 0.156  | 0.173  |
| DMSO-Reo                                   |           | 1203 | 11446 | 10.510 | 0.264  | 3000 | 14496 | 20.695 | -0.379 | -0.057 |
| DMSO-Reo                                   |           | 1410 | 13192 | 10.688 | 0.288  | 3241 | 14916 | 21.728 | 0.438  | 0.363  |
| DMSO-Reo                                   |           | 2522 | 12692 | 19.871 | 0.302  | 3437 | 12429 | 27.653 | 0.120  | 0.211  |
| DMSO-Reo                                   |           | 2717 | 14094 | 19.278 | 0.342  | 3149 | 11303 | 27.860 | 0.115  | 0.228  |
| DMSO-Reo                                   |           | 2662 | 13294 | 20.024 | 0.352  | 3486 | 12844 | 27.141 | -0.034 | 0.159  |
| DMSO-Reo                                   |           | 1234 | 11634 | 10.607 | 0.365  | 3283 | 15204 | 21.593 | 0.085  | 0.225  |
| DMSO-Reo                                   |           | 1450 | 13288 | 10.912 | 0.407  | 3134 | 15037 | 20.842 | 0.106  | 0.256  |
| DMSO-Reo                                   |           | 2348 | 13800 | 17.014 | 0.484  | 3373 | 15521 | 21.732 | 0.104  | 0.294  |
| DMSO-Reo                                   |           | 2752 | 13839 | 19.886 | 0.538  | 3472 | 12784 | 27.159 | -0.053 | 0.242  |
| DMSO-Reo                                   |           | 1286 | 11623 | 11.064 | 0.576  | 3370 | 15274 | 22.064 | 0.208  | 0.392  |
| DMSO-Reo                                   |           | 1329 | 11760 | 11.301 | 0.581  | 3067 | 14438 | 21.243 | -0.134 | 0.223  |
| DMSO-Reo                                   |           | 2525 | 12041 | 20.970 | 0.656  | 3396 | 11444 | 29.675 | 0.727  | 0.692  |
| DMSO-Reo                                   |           | 1347 | 11741 | 11.473 | 0.688  | 3210 | 14540 | 22.077 | 0.160  | 0.424  |
| DMSO-Reo                                   |           | 1538 | 13144 | 11.701 | 0.826  | 3100 | 14507 | 21.369 | 0.304  | 0.565  |
| DMSO-Reo                                   |           | 1297 | 10700 | 12.121 | 1.064  | 3266 | 14369 | 22.729 | 0.383  | 0.723  |
| DMSO-Reo                                   |           | 970  | 7946  | 12.207 | 1.194  | 2771 | 13438 | 20.621 | -0.400 | 0.397  |

|                           |           |      |       |        |        |      |       |        |        |        |
|---------------------------|-----------|------|-------|--------|--------|------|-------|--------|--------|--------|
| DMSO-Reo                  |           | 2769 | 14439 | 19.177 | 1.274  | 2408 | 12087 | 19.922 | -0.077 | 0.599  |
| DMSO-Reo                  |           | 1300 | 10461 | 12.427 | 1.286  | 3058 | 13811 | 22.142 | 0.183  | 0.734  |
| DMSO-Reo                  |           | 2946 | 15289 | 19.269 | 1.304  | 2313 | 11475 | 20.157 | 0.003  | 0.653  |
| DMSO-Reo                  |           | 1552 | 12136 | 12.788 | 1.404  | 3075 | 14107 | 21.798 | 0.464  | 0.934  |
| DMSO-Reo                  |           | 2972 | 14981 | 19.838 | 1.488  | 1967 | 10260 | 19.172 | -0.333 | 0.578  |
| DMSO-Reo                  |           | 2818 | 13985 | 20.150 | 1.589  | 2336 | 10694 | 21.844 | 0.578  | 1.084  |
| DMSO-Reo                  |           | 2971 | 12775 | 23.256 | 1.623  | 3171 | 11619 | 27.292 | -0.021 | 0.801  |
| Docetaxel                 | 46386672  | 465  | 7167  | 6.488  | -1.536 | 1410 | 8316  | 16.955 | -1.129 | -1.333 |
| Dofetilide                | 46386638  | 3268 | 17241 | 18.955 | 0.008  | 4437 | 16465 | 26.948 | -0.092 | -0.042 |
| Dolasetron mesylate       | 46386881  | 3156 | 14551 | 21.689 | 1.119  | 3836 | 12928 | 29.672 | 0.548  | 0.834  |
| Donepezil hydrochloride   | 46386644  | 4129 | 17065 | 24.196 | 2.145  | 4841 | 15139 | 31.977 | 1.999  | 2.072  |
| Dopamine hydrochloride    | 104170043 | 3037 | 16398 | 18.521 | 0.099  | 3950 | 14911 | 26.491 | -0.213 | -0.057 |
| Doxapram hydrochloride    | 46386821  | 1047 | 11320 | 9.249  | -0.262 | 3156 | 14297 | 22.075 | 0.211  | -0.025 |
| Doxazosin                 | 104170183 | 2074 | 16775 | 12.364 | 1.280  | 4603 | 17542 | 26.240 | 1.218  | 1.249  |
| Doxepin hydrochloride     | 104169945 | 1546 | 14684 | 10.528 | 0.097  | 3963 | 17255 | 22.967 | 0.474  | 0.285  |
| Doxorubicin hydrochloride | 46386781  | 3010 | 5071  | 59.357 | 7.976  | 3707 | 7131  | 51.984 | 6.842  | 7.409  |
| Doxycycline               | 104170107 | 1062 | 11505 | 9.231  | -0.437 | 3107 | 14709 | 21.123 | -0.255 | -0.346 |
| Doxylamine succinate      | 46386900  | 1244 | 14065 | 8.845  | -0.448 | 3602 | 16522 | 21.801 | 0.140  | -0.154 |
| Droperidol                | 46386863  | 4336 | 16945 | 25.589 | 2.762  | 5156 | 16909 | 30.493 | 1.491  | 2.127  |
| Duloxetine hydrochloride  | 46386541  | 2284 | 14329 | 15.940 | 0.293  | 3588 | 15504 | 23.142 | 0.418  | 0.356  |
| DuP 697                   | 46387010  | 2447 | 16521 | 14.811 | 0.094  | 3563 | 16797 | 21.212 | -0.012 | 0.041  |
| Duvadilan                 | 104170012 | 1550 | 14926 | 10.385 | 0.126  | 3651 | 16325 | 22.364 | 0.676  | 0.401  |
| E-4031 dihydrochloride    | 46387000  | 3461 | 16889 | 20.493 | 0.505  | 4268 | 16364 | 26.082 | -0.020 | 0.243  |
| E64d-Mock                 |           | 0    | 15020 | 0.000  | -8.572 | 2    | 14130 | 0.014  | -8.950 | -8.761 |
| E64d-Mock                 |           | 0    | 13528 | 0.000  | -8.572 | 1    | 13381 | 0.007  | -8.952 | -8.762 |
| E64d-Mock                 |           | 0    | 14666 | 0.000  | -8.572 | 1    | 14037 | 0.007  | -8.952 | -8.762 |
| E64d-Mock                 |           | 3    | 14561 | 0.021  | -8.563 | 1    | 13998 | 0.007  | -8.952 | -8.757 |
| E64d-Mock                 |           | 0    | 12895 | 0.000  | -6.496 | 6    | 15722 | 0.038  | -7.614 | -7.055 |
| E64d-Mock                 |           | 0    | 12257 | 0.000  | -6.496 | 1    | 15543 | 0.006  | -7.625 | -7.060 |
| E64d-Mock                 |           | 0    | 11144 | 0.000  | -6.496 | 0    | 14656 | 0.000  | -7.627 | -7.061 |
| E64d-Mock                 |           | 2    | 12065 | 0.017  | -6.485 | 8    | 15582 | 0.051  | -7.609 | -7.047 |
| E64d-Mock                 |           | 0    | 14540 | 0.000  | -6.093 | 4    | 14122 | 0.028  | -8.173 | -7.133 |
| E64d-Mock                 |           | 1    | 14636 | 0.007  | -6.091 | 1    | 14209 | 0.007  | -8.180 | -7.135 |
| E64d-Mock                 |           | 2    | 13244 | 0.015  | -6.088 | 0    | 12847 | 0.000  | -8.182 | -7.135 |
| E64d-Mock                 |           | 8    | 14473 | 0.055  | -6.075 | 1    | 13770 | 0.007  | -8.180 | -7.127 |
| E64d-Mock                 |           | 0    | 14313 | 0.000  | -5.864 | 2    | 12547 | 0.016  | -6.550 | -6.207 |
| E64d-Mock                 |           | 0    | 15025 | 0.000  | -5.864 | 1    | 14386 | 0.007  | -6.552 | -6.208 |
| E64d-Mock                 |           | 0    | 14877 | 0.000  | -5.864 | 0    | 12886 | 0.000  | -6.553 | -6.209 |
| E64d-Mock                 |           | 5    | 14651 | 0.034  | -5.853 | 2    | 14406 | 0.014  | -6.550 | -6.202 |
| E64d-Mock                 |           | 0    | 11069 | 0.000  | -5.495 | 1    | 15430 | 0.006  | -6.336 | -5.916 |
| E64d-Mock                 |           | 1    | 3239  | 0.031  | -5.478 | 4    | 15431 | 0.026  | -6.331 | -5.904 |
| E64d-Mock                 |           | 4    | 9894  | 0.040  | -5.473 | 0    | 15555 | 0.000  | -6.338 | -5.905 |
| E64d-Mock                 |           | 0    | 13251 | 0.000  | -5.396 | 18   | 15849 | 0.114  | -7.652 | -6.524 |
| E64d-Mock                 |           | 0    | 13806 | 0.000  | -5.396 | 9    | 16080 | 0.056  | -7.674 | -6.535 |
| E64d-Mock                 |           | 2    | 13007 | 0.015  | -5.388 | 21   | 15574 | 0.135  | -7.644 | -6.516 |
| E64d-Mock                 |           | 10   | 12278 | 0.081  | -5.353 | 3    | 14986 | 0.020  | -7.687 | -6.520 |
| E64d-Mock                 |           | 7    | 2484  | 0.282  | -5.341 | 13   | 14292 | 0.091  | -6.312 | -5.826 |
| E64d-Mock                 |           | 0    | 15531 | 0.000  | -4.930 | 14   | 14181 | 0.099  | -6.835 | -5.883 |
| E64d-Mock                 |           | 0    | 15245 | 0.000  | -4.930 | 3    | 14869 | 0.020  | -6.862 | -5.896 |
| E64d-Mock                 |           | 0    | 14240 | 0.000  | -4.930 | 0    | 13036 | 0.000  | -6.869 | -5.900 |
| E64d-Mock                 |           | 0    | 15319 | 0.000  | -4.930 | 0    | 13576 | 0.000  | -6.869 | -5.900 |
| E64d-Mock                 |           | 0    | 11436 | 0.000  | -4.530 | 4    | 15630 | 0.026  | -5.563 | -5.046 |
| E64d-Mock                 |           | 0    | 11613 | 0.000  | -4.530 | 1    | 14839 | 0.007  | -5.568 | -5.049 |
| E64d-Mock                 |           | 1    | 12031 | 0.008  | -4.526 | 2    | 15530 | 0.013  | -5.566 | -5.046 |
| E64d-Mock                 |           | 3    | 12040 | 0.025  | -4.518 | 5    | 15360 | 0.033  | -5.561 | -5.040 |
| E64d-Mock                 |           | 2    | 14244 | 0.014  | -2.525 | 15   | 16449 | 0.091  | -4.716 | -3.620 |
| E64d-Mock                 |           | 16   | 15244 | 0.105  | -2.509 | 4    | 16899 | 0.024  | -4.731 | -3.620 |
| E64d-Mock                 |           | 24   | 14668 | 0.164  | -2.498 | 26   | 16605 | 0.157  | -4.701 | -3.600 |
| E64d-Mock                 |           | 43   | 14588 | 0.295  | -2.475 | 17   | 16933 | 0.100  | -4.713 | -3.594 |
| E64d-Reo                  |           | 19   | 13616 | 0.140  | -8.510 | 41   | 5058  | 0.811  | -8.677 | -8.593 |
| E64d-Reo                  |           | 19   | 12552 | 0.151  | -8.505 | 57   | 11638 | 0.490  | -8.787 | -8.646 |
| E64d-Reo                  |           | 37   | 12824 | 0.289  | -8.444 | 29   | 4037  | 0.718  | -8.708 | -8.576 |
| E64d-Reo                  |           | 40   | 13350 | 0.300  | -8.439 | 27   | 4413  | 0.612  | -8.745 | -8.592 |
| E64d-Reo                  |           | 0    | 11704 | 0.000  | -6.496 | 27   | 14853 | 0.182  | -7.563 | -7.029 |
| E64d-Reo                  |           | 1    | 12067 | 0.008  | -6.490 | 13   | 14459 | 0.090  | -7.595 | -7.043 |
| E64d-Reo                  |           | 5    | 12085 | 0.041  | -6.470 | 20   | 14634 | 0.137  | -7.579 | -7.024 |
| E64d-Reo                  |           | 7    | 10207 | 0.069  | -6.453 | 12   | 13824 | 0.087  | -7.596 | -7.025 |
| E64d-Reo                  |           | 14   | 13193 | 0.106  | -6.059 | 59   | 13027 | 0.453  | -8.046 | -7.052 |
| E64d-Reo                  |           | 16   | 12506 | 0.128  | -6.052 | 44   | 11593 | 0.380  | -8.068 | -7.060 |
| E64d-Reo                  |           | 20   | 12613 | 0.159  | -6.042 | 31   | 12637 | 0.245  | -8.108 | -7.075 |
| E64d-Reo                  |           | 39   | 13159 | 0.296  | -5.998 | 26   | 12956 | 0.201  | -8.122 | -7.060 |
| E64d-Reo                  |           | 10   | 13968 | 0.072  | -5.841 | 23   | 12055 | 0.191  | -6.508 | -6.174 |
| E64d-Reo                  |           | 13   | 13819 | 0.094  | -5.834 | 35   | 11627 | 0.301  | -6.481 | -6.158 |
| E64d-Reo                  |           | 15   | 13976 | 0.107  | -5.830 | 23   | 11353 | 0.203  | -6.505 | -6.167 |
| E64d-Reo                  |           | 16   | 13404 | 0.119  | -5.826 | 23   | 10884 | 0.211  | -6.503 | -6.164 |
| E64d-Reo                  |           | 0    | 10146 | 0.000  | -5.495 | 23   | 14739 | 0.156  | -6.293 | -5.894 |
| E64d-Reo                  |           | 1    | 10139 | 0.010  | -5.490 | 50   | 15005 | 0.333  | -6.242 | -5.866 |
| E64d-Reo                  |           | 2    | 9602  | 0.021  | -5.484 | 16   | 15010 | 0.107  | -6.307 | -5.895 |
| E64d-Reo                  |           | 4    | 3424  | 0.117  | -5.431 | 17   | 13892 | 0.122  | -6.303 | -5.867 |
| E64d-Reo                  |           | 0    | 13058 | 0.000  | -5.396 | 23   | 15637 | 0.147  | -7.640 | -6.518 |
| E64d-Reo                  |           | 1    | 13256 | 0.008  | -5.392 | 40   | 15159 | 0.264  | -7.596 | -6.494 |
| E64d-Reo                  |           | 1    | 12725 | 0.008  | -5.392 | 9    | 15414 | 0.058  | -7.673 | -6.532 |
| E64d-Reo                  |           | 3    | 11514 | 0.026  | -5.382 | 10   | 14164 | 0.071  | -7.669 | -6.525 |
| E64d-Reo                  |           | 11   | 14213 | 0.077  | -4.905 | 19   | 10055 | 0.189  | -6.805 | -5.855 |
| E64d-Reo                  |           | 16   | 14977 | 0.107  | -4.896 | 30   | 10870 | 0.276  | -6.775 | -5.835 |
| E64d-Reo                  |           | 17   | 14771 | 0.115  | -4.893 | 20   | 9896  | 0.202  | -6.800 | -5.847 |



|                                   |           |      |       |        |        |      |       |        |        |        |
|-----------------------------------|-----------|------|-------|--------|--------|------|-------|--------|--------|--------|
| E64d-Reo                          |           | 19   | 14741 | 0.129  | -4.889 | 7    | 10461 | 0.067  | -6.846 | -5.867 |
| E64d-Reo                          |           | 1    | 11072 | 0.009  | -4.526 | 27   | 15862 | 0.170  | -5.525 | -5.025 |
| E64d-Reo                          |           | 3    | 10351 | 0.029  | -4.516 | 20   | 15151 | 0.132  | -5.535 | -5.026 |
| E64d-Reo                          |           | 10   | 11305 | 0.088  | -4.489 | 39   | 16008 | 0.244  | -5.506 | -4.997 |
| E64d-Reo                          |           | 11   | 10907 | 0.101  | -4.483 | 29   | 15819 | 0.183  | -5.522 | -5.002 |
| E64d-Reo                          |           | 7    | 14046 | 0.050  | -2.519 | 24   | 16201 | 0.148  | -4.703 | -3.611 |
| E64d-Reo                          |           | 11   | 14437 | 0.076  | -2.514 | 25   | 16099 | 0.155  | -4.701 | -3.608 |
| E64d-Reo                          |           | 14   | 14045 | 0.100  | -2.510 | 21   | 16649 | 0.126  | -4.708 | -3.609 |
| E64d-Reo                          |           | 19   | 13687 | 0.139  | -2.503 | 62   | 15391 | 0.403  | -4.646 | -3.574 |
| Ebselen                           | 46386980  | 810  | 11024 | 7.348  | -1.139 | 3171 | 14917 | 21.258 | -0.003 | -0.571 |
| Econazole nitrate                 | 104170005 | 1778 | 16427 | 10.824 | 0.360  | 3805 | 17202 | 22.120 | 0.585  | 0.472  |
| Edrophonium chloride              | 104170059 | 1409 | 14948 | 9.426  | -0.180 | 3543 | 17431 | 20.326 | -0.247 | -0.213 |
| Efavirenz                         | 46386724  | 2482 | 16656 | 14.902 | 0.110  | 4212 | 16279 | 25.874 | 1.027  | 0.568  |
| Enalapril maleate                 | 104170123 | 1707 | 15881 | 10.749 | 0.235  | 3811 | 17452 | 21.837 | 0.075  | 0.155  |
| Enalaprilat                       | 46386741  | 2668 | 14384 | 18.548 | 0.108  | 3260 | 12213 | 26.693 | -0.165 | -0.029 |
| Enrofloxacin                      | 46386889  | 1266 | 11271 | 11.232 | 0.538  | 3104 | 13783 | 22.520 | 0.316  | 0.427  |
| Epigallocatechin gallate          | 46386901  | 2362 | 13233 | 17.849 | -0.666 | 3334 | 13124 | 25.404 | -0.252 | -0.459 |
| Epirubicin hydrochloride          | 46386577  | 1455 | 4466  | 32.579 | 3.238  | 1978 | 6524  | 30.319 | 2.017  | 2.627  |
| Eryped                            | 104170095 | 1417 | 15546 | 9.115  | -0.500 | 3753 | 17997 | 20.853 | -0.333 | -0.417 |
| Escitalopram oxalate              | 46386725  | 2310 | 16807 | 13.744 | -0.095 | 3766 | 17605 | 21.392 | 0.028  | -0.033 |
| Esmolol hydrochloride             | 46386551  | 2214 | 16325 | 13.562 | -0.127 | 3468 | 16791 | 20.654 | -0.136 | -0.132 |
| Esomeprazole magnesium            | 46386556  | 3664 | 17230 | 21.265 | 0.847  | 4711 | 17136 | 27.492 | 0.463  | 0.655  |
| Estradiol valerate                | 104170058 | 3384 | 17807 | 19.004 | 0.254  | 4108 | 16173 | 25.400 | -0.474 | -0.110 |
| Estrone 3-sulfate sodium salt     | 46386974  | 982  | 11179 | 8.784  | -0.476 | 3070 | 15209 | 20.185 | -0.284 | -0.380 |
| Eszopiclone                       | 104170161 | 1230 | 11891 | 10.344 | -0.019 | 3045 | 14489 | 21.016 | -0.214 | -0.116 |
| Ethacrynic acid                   | 104169948 | 1499 | 14710 | 10.190 | 0.173  | 3444 | 17222 | 19.998 | -0.333 | -0.080 |
| Ethambutol                        | 104170193 | 1677 | 16446 | 10.197 | 0.026  | 3566 | 17437 | 20.451 | -0.040 | -0.007 |
| Ethionamide                       | 104170006 | 1485 | 14825 | 10.017 | -0.006 | 3826 | 16627 | 23.011 | 0.288  | 0.141  |
| Ethylestrenol                     | 46386573  | 1986 | 14191 | 13.995 | -0.402 | 2309 | 12208 | 18.914 | -0.421 | -0.412 |
| Ethinylestradiol                  | 46386858  | 1171 | 14199 | 8.247  | -0.724 | 3459 | 17165 | 20.151 | -0.292 | -0.508 |
| Etodolac                          | 104170216 | 1563 | 16286 | 9.597  | -0.293 | 3439 | 17880 | 19.234 | -0.496 | -0.394 |
| Etomidate                         | 46386983  | 3082 | 15750 | 19.568 | 0.205  | 4229 | 15619 | 27.076 | -0.053 | 0.076  |
| Etomoxir                          | 46386895  | 2941 | 15326 | 19.190 | 0.083  | 4161 | 14857 | 28.007 | 0.226  | 0.155  |
| Etoposide                         | 46386954  | 1703 | 9973  | 17.076 | 3.350  | 3478 | 11627 | 29.913 | 2.264  | 2.807  |
| Exemestane                        | 46386592  | 2393 | 16788 | 14.254 | -0.318 | 3092 | 15021 | 20.585 | 0.149  | -0.085 |
| Ezetimibe                         | 46386640  | 3137 | 16938 | 18.520 | 1.062  | 3069 | 14304 | 21.456 | 0.446  | 0.754  |
| Famciclovir                       | 46386745  | 2733 | 14827 | 18.433 | -0.160 | 4242 | 15917 | 26.651 | -0.181 | -0.171 |
| Famotidine                        | 46386903  | 2802 | 14034 | 19.966 | 0.272  | 3316 | 13098 | 25.317 | -0.282 | -0.005 |
| Felbamate                         | 46386855  | 1428 | 14328 | 9.966  | 0.070  | 3544 | 16263 | 21.792 | 0.137  | 0.103  |
| Felodipine                        | 104170219 | 1343 | 12962 | 10.361 | 0.183  | 3708 | 17397 | 21.314 | -0.200 | -0.009 |
| Fenofibrate                       | 104169950 | 2158 | 15796 | 13.662 | 1.869  | 4542 | 16825 | 26.996 | 2.410  | 2.139  |
| Fenoldopam mesylate               | 46386722  | 2283 | 16237 | 14.060 | -0.039 | 3845 | 17450 | 22.034 | 0.172  | 0.066  |
| Fenpiverinium bromide             | 46386658  | 2361 | 16907 | 13.965 | -0.412 | 3142 | 15674 | 20.046 | -0.035 | -0.223 |
| Fexofenadine hydrochloride        | 104170222 | 1463 | 13377 | 10.937 | 0.498  | 3809 | 15818 | 24.080 | 0.596  | 0.547  |
| Finasteride                       | 46386559  | 2914 | 16543 | 17.615 | 0.769  | 2869 | 14408 | 19.913 | -0.080 | 0.344  |
| Flecainide hydrochloride          |           | 3968 | 16962 | 23.393 | 1.790  | 4902 | 17170 | 28.550 | 0.825  | 1.308  |
| Floxuridine                       | 104170121 | 845  | 10139 | 8.334  | -0.964 | 2319 | 11744 | 19.746 | -0.304 | -0.634 |
| Flubendazole                      | 46386742  | 492  | 6799  | 7.236  | -3.534 | 1079 | 5714  | 18.883 | -2.034 | -2.784 |
| Fluconazole                       | 104170148 | 3150 | 17352 | 18.154 | -0.020 | 4205 | 15356 | 27.383 | 0.001  | -0.010 |
| Flucytosine                       | 46386766  | 1675 | 16534 | 10.131 | -0.009 | 3390 | 16457 | 20.599 | 0.015  | 0.003  |
| Fludarabine                       | 104170131 | 1382 | 12438 | 11.111 | 0.594  | 3314 | 14001 | 23.670 | 0.478  | 0.536  |
| Flumadine hydrochloride           | 104170172 | 2015 | 16454 | 12.246 | 1.116  | 4141 | 17269 | 23.979 | 1.281  | 1.198  |
| Flumazenil                        | 46386776  | 1304 | 13579 | 9.603  | -0.098 | 3610 | 17269 | 20.905 | -0.095 | -0.097 |
| Flunisolide                       | 104170214 | 1386 | 15621 | 8.873  | -0.633 | 3619 | 17420 | 20.775 | -0.356 | -0.494 |
| Fluocinolonide acetone            | 104170060 | 2784 | 12011 | 23.179 | 1.598  | 4028 | 11561 | 34.841 | 1.786  | 1.692  |
| Fluocinolonide acetone 21-acetate | 104170119 | 1955 | 14055 | 13.910 | 2.001  | 3802 | 15636 | 24.316 | 1.407  | 1.704  |
| Fluorometholone                   | 104170223 | 1376 | 11690 | 11.771 | 0.955  | 3713 | 14544 | 25.529 | 1.013  | 0.984  |
| Fluoxetine hydrochloride          | 104170213 | 1593 | 13765 | 11.573 | 0.847  | 4366 | 16390 | 26.638 | 1.333  | 1.090  |
| Fluprelapine                      | 46386904  | 2315 | 17112 | 13.529 | -0.133 | 3680 | 17669 | 20.827 | -0.097 | -0.115 |
| Fluphenazine dihydrochloride      | 46386937  | 1094 | 14435 | 7.579  | -1.032 | 2960 | 17184 | 17.225 | -1.059 | -1.046 |
| Flurbiprofen                      | 46386788  | 2543 | 17308 | 14.693 | -0.177 | 3101 | 15382 | 20.160 | 0.004  | -0.086 |
| Flutamide                         | 104169949 | 3197 | 17958 | 17.803 | -0.133 | 3812 | 14003 | 27.223 | -0.038 | -0.085 |
| Fluticasone propionate            | 46386601  | 2273 | 12537 | 18.130 | 0.681  | 3563 | 14569 | 24.456 | 0.711  | 0.696  |
| Fluvastatin                       | 104170157 | 1507 | 9966  | 15.121 | 2.448  | 3829 | 12054 | 31.765 | 2.749  | 2.599  |
| Fluxoxamine maleate               | 46386804  | 2405 | 16566 | 14.518 | 0.042  | 3839 | 16831 | 22.809 | 0.344  | 0.193  |
| Folic acid                        | 104169953 | 1503 | 12411 | 12.110 | 1.141  | 3962 | 17719 | 22.360 | 0.101  | 0.621  |
| Formoterol fumarate dihydrate     | 46386732  | 2300 | 16625 | 13.835 | -0.079 | 3431 | 17180 | 19.971 | -0.288 | -0.184 |
| Furosemide                        | 104169951 | 1515 | 14592 | 10.382 | 0.194  | 4020 | 17837 | 22.537 | 0.152  | 0.173  |
| Gabexate mesilate                 | 46386710  | 1302 | 14447 | 9.012  | -0.371 | 3679 | 16708 | 22.019 | 0.197  | -0.087 |
| Galanthamine hydrobromide         | 46386805  | 3318 | 17455 | 19.009 | -0.152 | 4322 | 16979 | 25.455 | -0.235 | -0.193 |
| Ganciclovir                       | 104170145 | 2976 | 16482 | 18.056 | -0.051 | 3716 | 13930 | 26.676 | -0.169 | -0.110 |
| Gatifloxacin                      | 104170200 | 1402 | 14916 | 9.399  | -0.344 | 3584 | 16724 | 21.430 | -0.167 | -0.256 |
| Gemfibrozil                       | 104170063 | 2952 | 17274 | 17.089 | -0.362 | 3951 | 14987 | 26.363 | -0.244 | -0.303 |
| Glimepiride                       | 46386690  | 3503 | 17841 | 19.635 | 0.125  | 4556 | 17784 | 25.619 | -0.179 | -0.027 |
| Glipizide                         | 104170062 | 1569 | 14993 | 10.465 | 0.169  | 3298 | 17005 | 19.394 | -0.436 | -0.133 |
| Glyburide                         | 104170064 | 3199 | 16756 | 19.092 | 0.282  | 3881 | 14235 | 27.264 | -0.028 | 0.127  |
| Glycopyrronium bromide            | 46386646  | 3024 | 16125 | 18.753 | -0.057 | 4127 | 14872 | 27.750 | 0.149  | 0.046  |
| Goserelin acetate                 |           | 2381 | 13503 | 17.633 | -0.761 | 3623 | 13699 | 26.447 | 0.105  | -0.328 |
| GR 79236                          | 46387015  | 1418 | 14439 | 9.821  | -0.346 | 3540 | 16883 | 20.968 | -0.231 | -0.289 |
| GR 89696 fumarate                 | 46386996  | 3147 | 16489 | 19.085 | 0.050  | 4416 | 15588 | 28.329 | 0.323  | 0.186  |
| Granisetron hydrochloride         | 46386545  | 2521 | 16332 | 15.436 | 0.204  | 3864 | 16647 | 23.211 | 0.434  | 0.319  |
| Griseofulvin                      | 104170114 | 1557 | 15416 | 10.100 | -0.025 | 3432 | 17196 | 19.958 | -0.224 | -0.125 |
| Halometasone monohydrate          | 46386633  | 1210 | 9648  | 12.541 | 1.258  | 3721 | 14437 | 25.774 | 1.180  | 1.219  |
| Haloperidol hydrochloride         | 46386806  | 3242 | 17055 | 19.009 | 0.836  | 4869 | 16880 | 28.845 | 1.688  | 1.262  |
| Hexachlorophene                   | 104170010 | 668  | 11131 | 6.001  | -2.207 | 2303 | 14676 | 15.692 | -1.819 | -2.013 |
| Hexamethylenesacetamide           | 46386869  | 2131 | 15158 | 14.059 | -0.040 | 3439 | 15721 | 21.875 | 0.136  | 0.048  |

|                                |           |      |       |        |        |      |       |        |        |        |
|--------------------------------|-----------|------|-------|--------|--------|------|-------|--------|--------|--------|
| Homoharringtonine              | 46386877  | 4    | 5267  | 0.076  | -5.840 | 13   | 6000  | 0.217  | -6.502 | -6.171 |
| Homoveratrylamine              | 46386943  | 3201 | 16609 | 19.273 | 0.110  | 4452 | 16124 | 27.611 | 0.107  | 0.109  |
| Honokiol                       | 46386673  | 3240 | 17356 | 18.668 | -0.085 | 4443 | 16666 | 26.659 | -0.179 | -0.132 |
| HMT dimaleate                  | 46386998  | 2404 | 15066 | 15.956 | 0.232  | 2954 | 12892 | 22.913 | 0.943  | 0.588  |
| Huperzine A                    | 46386885  | 3457 | 18159 | 19.037 | -0.139 | 4394 | 17531 | 25.064 | -0.369 | -0.254 |
| Hydrochlorothiazide            | 104170008 | 1664 | 15816 | 10.521 | 0.270  | 3950 | 17170 | 23.005 | 0.287  | 0.278  |
| Hydrocortisone                 | 104169954 | 1339 | 10992 | 12.182 | 1.180  | 3490 | 14090 | 24.769 | 0.795  | 0.987  |
| Hydrocortisone 17-valerate     | 104170102 | 3105 | 14507 | 21.403 | 1.027  | 4462 | 13993 | 31.887 | 1.079  | 1.053  |
| Hydrocortisone hemisuccinate   | 104170065 | 2546 | 13105 | 19.428 | 0.391  | 3749 | 11789 | 31.801 | 1.058  | 0.724  |
| Hydroflumethiazide             | 104169994 | 1838 | 15674 | 11.726 | 0.840  | 3573 | 15553 | 22.973 | 0.904  | 0.872  |
| Hydroxyzine pamoate            | 104170009 | 1458 | 15656 | 9.313  | -0.392 | 3730 | 17262 | 21.608 | -0.116 | -0.254 |
| Hyperoside                     | 46386811  | 2219 | 16143 | 13.746 | -0.095 | 3619 | 17417 | 20.779 | -0.108 | -0.101 |
| Ibuprofen                      | 104169956 | 1211 | 12140 | 9.975  | 0.074  | 3315 | 14863 | 22.304 | 0.271  | 0.172  |
| Icariin                        | 46386578  | 3021 | 16847 | 17.932 | 0.871  | 3188 | 15364 | 20.750 | 0.205  | 0.538  |
| Idarubicin hydrochloride       | 46386733  | 1299 | 7517  | 17.281 | -0.531 | 2016 | 6905  | 29.196 | 0.583  | 0.026  |
| Idebenone                      | 46386682  | 1089 | 11578 | 9.406  | -0.606 | 3069 | 14031 | 21.873 | 0.088  | -0.259 |
| Ifenprodil hemitartrate        | 46386807  | 3527 | 17496 | 20.159 | 1.592  | 3985 | 15278 | 26.083 | 2.023  | 1.808  |
| Imatinib mesylate              | 46386639  | 1367 | 16866 | 8.105  | -1.093 | 1943 | 16939 | 11.471 | -2.181 | -1.637 |
| Imipramine hydrochloride       | 104170068 | 1318 | 13157 | 10.017 | -0.069 | 3159 | 15273 | 20.684 | 0.047  | -0.011 |
| Indapamide                     | 104170066 | 1266 | 12595 | 10.052 | -0.051 | 3207 | 15264 | 21.010 | 0.169  | 0.059  |
| Indatraline hydrochloride      | 46386808  | 2606 | 14520 | 17.948 | 0.649  | 4100 | 15160 | 27.045 | 1.288  | 0.968  |
| Indinavir sulfate              | 46386606  | 1991 | 15283 | 13.028 | -0.222 | 3285 | 15502 | 21.191 | -0.016 | -0.119 |
| Indirubin                      | 46386581  | 4016 | 17120 | 23.458 | 1.819  | 4837 | 16452 | 29.401 | 1.117  | 1.468  |
| Indomethacin hydrate           | 46386809  | 1190 | 11144 | 10.678 | 0.191  | 3126 | 14965 | 20.889 | -0.259 | -0.034 |
| Ipidacrine                     | 46386925  | 3067 | 17058 | 17.980 | -0.306 | 4206 | 15986 | 26.311 | -0.283 | -0.295 |
| Ipratropium bromide            | 104170067 | 1427 | 14791 | 9.648  | -0.208 | 3695 | 17250 | 21.420 | -0.170 | -0.189 |
| Ipriflavone                    | 46386694  | 1729 | 16681 | 10.365 | 0.116  | 3512 | 17331 | 20.264 | -0.110 | 0.003  |
| Irbesartan                     | 46386566  | 2971 | 15576 | 19.074 | 0.046  | 4090 | 14987 | 27.290 | 0.011  | 0.029  |
| Irinotecan hydrochloride       | 46386616  | 2455 | 12612 | 19.466 | 0.917  | 3802 | 13669 | 27.815 | 1.459  | 1.188  |
| Irsogladine maleate            | 46386698  | 2734 | 16128 | 16.952 | -0.637 | 4139 | 15342 | 26.978 | -0.083 | -0.360 |
| Isoniazid                      | 104170011 | 1401 | 15084 | 9.288  | -0.457 | 3400 | 16541 | 20.555 | -0.001 | -0.229 |
| Isoproterenol hydrochloride    | 104170013 | 1458 | 15345 | 9.501  | -0.546 | 3665 | 16779 | 21.843 | 0.077  | -0.234 |
| Isoquercitrin                  | 46386780  | 2462 | 17543 | 14.034 | -0.390 | 3195 | 15681 | 20.375 | 0.077  | -0.156 |
| Isotretinoin                   | 104170133 | 3003 | 16374 | 18.340 | 0.040  | 4090 | 14612 | 27.991 | 0.146  | 0.093  |
| Isradipine                     | 46386602  | 2810 | 16563 | 16.966 | -0.633 | 4187 | 16092 | 26.019 | -0.371 | -0.502 |
| Itavastatin calcium            | 46386827  | 3368 | 14431 | 23.339 | 1.766  | 4277 | 13469 | 31.754 | 1.923  | 1.844  |
| Itopride hydrochloride         | 46386560  | 1919 | 14417 | 13.311 | -0.172 | 3654 | 14620 | 24.993 | 0.831  | 0.329  |
| Itraconazole                   | 46386736  | 1620 | 16098 | 10.063 | -2.854 | 3138 | 14302 | 21.941 | -1.595 | -2.224 |
| Ketoconazole                   | 46386810  | 3113 | 17103 | 18.201 | -0.235 | 4578 | 16045 | 28.532 | 0.384  | 0.074  |
| Ketoprofen                     | 104169957 | 1620 | 15763 | 10.277 | -0.060 | 3798 | 17480 | 21.728 | 0.037  | -0.012 |
| Ketorolac tromethamine         | 46386614  | 3361 | 17163 | 19.583 | 1.406  | 2943 | 15545 | 18.932 | -0.415 | 0.496  |
| Ketotifen fumarate             | 46386834  | 2491 | 13461 | 18.505 | -0.375 | 3478 | 13145 | 26.459 | 0.109  | -0.133 |
| Kitasamycin                    | 46386711  | 964  | 12174 | 7.919  | -1.185 | 3038 | 14682 | 20.692 | 0.050  | -0.568 |
| L-694,247                      | 46386999  | 3187 | 16932 | 18.822 | -0.035 | 4699 | 16121 | 29.148 | 0.569  | 0.267  |
| L-NMMA acetate                 | 46386919  | 2105 | 14288 | 14.733 | 0.080  | 3395 | 16221 | 20.930 | -0.074 | 0.003  |
| L-Thyroxine                    | 104169983 | 1335 | 14340 | 9.310  | -0.666 | 3871 | 16941 | 22.850 | 0.433  | -0.117 |
| Labetalol hydrochloride        | 104170069 | 1732 | 16631 | 10.414 | 0.212  | 4254 | 18003 | 23.629 | 0.466  | 0.339  |
| Lacidipine                     | 46386664  | 2424 | 16867 | 14.371 | -1.468 | 3620 | 15853 | 22.835 | -1.327 | -1.397 |
| Lamivudine                     | 46386600  | 2283 | 16380 | 13.938 | -0.061 | 3448 | 17043 | 20.231 | -0.230 | -0.145 |
| Lamotrigine                    | 46386680  | 2936 | 16510 | 17.783 | -0.369 | 3966 | 15381 | 25.785 | -0.441 | -0.405 |
| Lansoprazole                   | 46386562  | 2341 | 16049 | 14.587 | 0.054  | 3913 | 16039 | 24.397 | 0.698  | 0.376  |
| Latanoprost                    | 46386728  | 2911 | 17585 | 16.554 | 0.426  | 3097 | 15675 | 19.758 | -0.133 | 0.146  |
| Letrozole                      | 46386665  | 1358 | 14055 | 9.662  | -0.071 | 3647 | 17537 | 20.796 | -0.124 | -0.097 |
| Levetiracetam                  | 46386557  | 2587 | 17536 | 14.753 | -0.157 | 3087 | 15809 | 19.527 | -0.212 | -0.185 |
| Levocetirizine                 | 46386593  | 3310 | 16928 | 19.553 | 0.200  | 4382 | 16426 | 26.677 | -0.173 | 0.014  |
| Levofloxacin                   | 46386771  | 1318 | 13809 | 9.544  | -0.125 | 3684 | 17428 | 21.138 | -0.034 | -0.080 |
| Levonorgestrel                 | 46386677  | 1580 | 15844 | 9.972  | -0.251 | 3432 | 16645 | 20.619 | -0.354 | -0.303 |
| Levosulpiride                  | 46386685  | 1758 | 16346 | 10.755 | 0.239  | 3463 | 15864 | 21.829 | 0.073  | 0.156  |
| Lidocaine                      | 46386868  | 3657 | 17618 | 20.577 | 0.622  | 4461 | 17571 | 25.388 | -0.257 | 0.182  |
| Lincomycin hydrochloride       | 104170115 | 1624 | 16229 | 10.007 | -0.075 | 3508 | 17724 | 19.792 | -0.287 | -0.181 |
| Linezolid                      | 46386641  | 3303 | 14991 | 22.033 | 2.198  | 2957 | 12619 | 23.433 | 1.120  | 1.659  |
| Linopirdine dihydrochloride    | 46386985  | 2069 | 16675 | 12.408 | -0.916 | 2956 | 15692 | 18.838 | -0.447 | -0.681 |
| Lobeline hydrochloride         | 46386920  | 1807 | 14748 | 12.253 | 1.124  | 4381 | 17043 | 25.706 | 1.162  | 1.143  |
| Lofepramine                    | 46386649  | 3187 | 17699 | 18.007 | 0.896  | 2705 | 15013 | 18.018 | -0.726 | 0.085  |
| Lofexidine hydrochloride       | 46386875  | 3059 | 16085 | 19.018 | 0.028  | 4271 | 15272 | 27.966 | 0.214  | 0.121  |
| Lomerizine dihydrochloride     | 46386707  | 1015 | 14579 | 9.962  | -1.317 | 3289 | 17537 | 18.755 | -0.658 | -0.988 |
| Lomifylline                    | 46386754  | 1827 | 15950 | 11.455 | 0.677  | 3563 | 17066 | 20.878 | -0.263 | 0.207  |
| Loperamide hydrochloride       | 104170070 | 2    | 14905 | 0.013  | -5.488 | 26   | 18123 | 0.143  | -6.297 | -5.892 |
| Loratadine                     | 46386837  | 2030 | 16719 | 12.142 | -0.379 | 3573 | 17392 | 20.544 | -0.160 | -0.270 |
| Lorazepam                      | 46386878  | 2252 | 13012 | 17.307 | -0.906 | 3480 | 12937 | 26.900 | 0.260  | -0.323 |
| Losartan potassium             | 46386652  | 2108 | 14843 | 14.202 | -0.014 | 3156 | 15622 | 20.202 | -0.236 | -0.125 |
| Loteprednol etabonate          | 46386647  | 1328 | 11144 | 11.917 | 0.970  | 3518 | 13599 | 25.870 | 1.205  | 1.087  |
| Lovastatin                     | 104170211 | 1645 | 12430 | 13.234 | 1.757  | 4152 | 13597 | 30.536 | 2.455  | 2.106  |
| Loxapine succinate             | 46386931  | 1555 | 14211 | 10.942 | 0.356  | 3677 | 16336 | 22.509 | 0.312  | 0.334  |
| Loxoprofen sodium              | 46386612  | 2312 | 16496 | 14.016 | -0.047 | 3643 | 17449 | 20.878 | -0.086 | -0.067 |
| LY 171883                      | 46386838  | 2692 | 14115 | 19.072 | 0.276  | 3472 | 12359 | 28.093 | 0.170  | 0.223  |
| Mafenide acetate               | 104170207 | 1738 | 15802 | 10.999 | 0.532  | 4153 | 18276 | 22.724 | 0.206  | 0.369  |
| Maltol                         | 46386945  | 3214 | 17058 | 18.842 | -0.029 | 4408 | 16529 | 26.668 | -0.176 | -0.102 |
| Maprotiline hydrochloride      | 46386839  | 2745 | 16836 | 16.304 | 0.358  | 4048 | 17362 | 23.315 | 0.457  | 0.407  |
| MDL 73005EF hydrochloride      | 46387017  | 1865 | 15845 | 11.770 | 0.874  | 3990 | 16748 | 23.824 | 0.776  | 0.825  |
| Mebendazole                    | 104170137 | 547  | 5683  | 9.625  | -2.765 | 988  | 4952  | 19.952 | -1.778 | -2.272 |
| Mecillinam                     | 46386744  | 1250 | 14049 | 8.897  | -0.424 | 3844 | 17431 | 22.053 | 0.205  | -0.109 |
| Mecizine hydrochloride         | 104170138 | 3109 | 17619 | 17.646 | -0.183 | 3906 | 15762 | 24.781 | -0.622 | -0.403 |
| Meclofenamic acid sodium salt  | 104170147 | 3175 | 17752 | 17.885 | -0.106 | 4181 | 15751 | 26.544 | -0.200 | -0.153 |
| Medroxyprogesterone            | 46387018  | 2611 | 15918 | 16.403 | 0.377  | 3418 | 14982 | 22.814 | 0.909  | 0.643  |
| Medroxyprogesterone 17-acetate | 104170072 | 1753 | 14937 | 11.736 | 0.936  | 4507 | 17456 | 25.819 | 1.097  | 1.016  |

|                                   |           |      |       |        |        |      |       |        |        |        |
|-----------------------------------|-----------|------|-------|--------|--------|------|-------|--------|--------|--------|
| Medryson                          | 104170097 | 1651 | 13688 | 12.062 | 1.114  | 4070 | 16558 | 24.580 | 0.740  | 0.927  |
| Mefenamic acid                    | 104170015 | 3235 | 17715 | 18.261 | 0.015  | 3981 | 13921 | 28.597 | 0.291  | 0.153  |
| Mefloquine hydrochloride          | 104170120 | 3535 | 16701 | 21.166 | 0.950  | 5403 | 14731 | 36.678 | 2.225  | 1.588  |
| Megestrol acetate                 | 46386702  | 2901 | 15277 | 18.989 | 0.019  | 4088 | 15020 | 27.217 | -0.011 | 0.004  |
| Meloxicam                         | 104170196 | 800  | 9147  | 8.746  | -0.702 | 3156 | 14630 | 21.572 | -0.126 | -0.414 |
| Memantine hydrochloride           | 104170178 | 3512 | 17820 | 19.708 | 0.481  | 4374 | 14943 | 29.271 | 0.452  | 0.467  |
| Mepenzolate bromide               | 104170016 | 2801 | 16437 | 17.041 | -0.378 | 4068 | 15145 | 26.860 | -0.125 | -0.251 |
| Mepirizole                        | 46386965  | 2558 | 12914 | 19.808 | 0.282  | 3465 | 12506 | 27.707 | 0.136  | 0.209  |
| Mepivacaine hydrochloride         | 46386949  | 1650 | 16543 | 9.974  | -0.092 | 3608 | 17548 | 20.561 | 0.001  | -0.046 |
| Mercaptopurine                    | 104170111 | 362  | 13660 | 2.650  | -3.987 | 1619 | 15940 | 10.157 | -3.893 | -3.940 |
| Meropenem                         | 46386666  | 2387 | 13278 | 17.977 | -0.307 | 3333 | 12198 | 27.324 | 0.021  | -0.143 |
| Mesalazine                        | 46386870  | 1314 | 12644 | 10.392 | 0.130  | 3233 | 15678 | 20.621 | 0.024  | 0.077  |
| Mesna                             | 104170146 | 1632 | 15438 | 10.571 | 0.124  | 3769 | 17093 | 22.050 | 0.151  | 0.137  |
| Mesoridazine besylate             | 46386921  | 1046 | 12788 | 8.180  | -1.046 | 3178 | 15379 | 20.665 | 0.040  | -0.503 |
| Mestanolone                       | 46386759  | 2276 | 14641 | 15.545 | 0.099  | 2810 | 13458 | 20.880 | 0.249  | 0.174  |
| Mestranol                         | 46386940  | 678  | 13750 | 4.931  | -2.254 | 2697 | 17223 | 15.659 | -1.469 | -1.862 |
| Metaproterenol                    | 104170149 | 3031 | 16220 | 18.687 | 0.152  | 3788 | 13501 | 28.057 | 0.162  | 0.157  |
| Methazolamide                     | 104170116 | 1007 | 10841 | 9.289  | -0.405 | 3205 | 14456 | 22.171 | 0.046  | -0.179 |
| Methimazole                       | 104170134 | 3276 | 18019 | 18.181 | -0.011 | 4141 | 15570 | 26.596 | -0.188 | -0.099 |
| Methocarbamol                     | 104170007 | 1488 | 15297 | 9.727  | -0.165 | 3898 | 17295 | 22.538 | 0.152  | -0.006 |
| Methotrexate trihydrate           | 46386835  | 1717 | 15835 | 10.843 | 0.294  | 3546 | 16870 | 21.020 | -0.213 | 0.040  |
| Methoxsalen                       | 104170150 | 2978 | 16876 | 17.646 | -0.183 | 3827 | 14673 | 26.082 | -0.311 | -0.247 |
| Methylandrostenediol              | 46386580  | 2850 | 12857 | 22.167 | 1.041  | 3678 | 12005 | 30.637 | 1.016  | 1.029  |
| Methylidopa                       | 104170018 | 2444 | 14023 | 17.429 | -0.253 | 3633 | 13050 | 27.839 | 0.110  | -0.072 |
| Methylperone hydrochloride        | 46387011  | 1506 | 13979 | 10.773 | 0.442  | 3941 | 16251 | 24.251 | 0.781  | 0.611  |
| Methylprednisolone                | 104170189 | 1682 | 13252 | 12.692 | 1.460  | 3898 | 14438 | 26.998 | 1.436  | 1.448  |
| Methylprednisolone acetate        | 104170126 | 1811 | 13815 | 13.109 | 1.713  | 3907 | 15185 | 25.729 | 1.448  | 1.580  |
| Methyltestosterone                | 46386739  | 3031 | 13313 | 22.767 | 1.235  | 4375 | 15898 | 27.519 | 0.080  | 0.657  |
| Metoclopramide hydrochloride      | 104170017 | 3179 | 17557 | 18.107 | -0.035 | 4622 | 16202 | 28.527 | 0.274  | 0.120  |
| Metronidazole                     | 46386860  | 3376 | 17546 | 19.241 | -0.049 | 4364 | 16694 | 26.141 | 0.000  | -0.025 |
| Metryapone                        | 104169960 | 1537 | 15152 | 10.144 | 0.064  | 3747 | 16949 | 22.107 | 0.028  | 0.046  |
| Mevastatin                        | 46386660  | 1474 | 10176 | 14.485 | 2.155  | 3831 | 12663 | 30.253 | 2.353  | 2.254  |
| Mexiletine hydrochloride          | 104170180 | 1788 | 15440 | 11.580 | 0.762  | 3967 | 17583 | 22.562 | 0.750  | 0.756  |
| Miconazole nitrate                | 104169959 | 1329 | 12525 | 10.611 | 0.246  | 3228 | 14514 | 22.241 | 0.630  | 0.438  |
| Midazolam hydrochloride           | 46386603  | 1166 | 11293 | 10.325 | 0.235  | 3331 | 14944 | 22.290 | 0.268  | 0.251  |
| Midodrine hydrochloride           | 104170071 | 1654 | 15407 | 10.735 | 0.388  | 3881 | 17777 | 21.832 | -0.051 | 0.168  |
| Miglitol                          | 46386758  | 1683 | 16187 | 10.397 | 0.015  | 3936 | 17524 | 22.461 | 0.295  | 0.155  |
| Milnacipran hydrochloride         | 46386905  | 2373 | 16331 | 14.531 | 0.044  | 3652 | 17181 | 21.256 | -0.002 | 0.021  |
| Milrinone                         | 46386629  | 2558 | 17465 | 14.646 | -0.192 | 2913 | 14905 | 19.544 | -0.206 | -0.199 |
| Minocycline hydrochloride         | 104169958 | 1316 | 13110 | 10.038 | 0.006  | 3721 | 17005 | 21.882 | -0.037 | -0.016 |
| Minoxidil                         | 104170184 | 1498 | 14862 | 10.079 | 0.028  | 3932 | 17294 | 22.736 | 0.209  | 0.119  |
| Mirtazapine                       | 46386716  | 2168 | 14351 | 15.107 | -0.043 | 2499 | 13117 | 19.052 | -0.374 | -0.208 |
| Mitoxantrone hydrochloride        | 104170122 | 1519 | 7801  | 19.472 | 0.405  | 1473 | 7316  | 20.134 | -1.735 | -0.665 |
| MK 886                            | 46386984  | 2225 | 16686 | 13.335 | -0.168 | 3545 | 17518 | 20.236 | -0.229 | -0.198 |
| Moclobemide                       | 46386631  | 1451 | 14112 | 10.282 | 0.215  | 3449 | 16498 | 20.906 | -0.095 | 0.060  |
| Modafinil                         | 46386605  | 2922 | 13583 | 21.512 | 0.831  | 3457 | 12518 | 27.616 | 0.109  | 0.470  |
| Molindone hydrochloride           | 104170156 | 2485 | 13657 | 18.196 | -0.006 | 3705 | 12713 | 29.143 | 0.422  | 0.208  |
| Montelukast sodium                | 46386714  | 3278 | 16347 | 20.053 | 0.361  | 4451 | 15627 | 28.483 | 0.369  | 0.365  |
| Mosapride citrate                 | 46386693  | 2441 | 16681 | 14.633 | 0.062  | 3659 | 16851 | 21.714 | 0.100  | 0.081  |
| Moxifloxacin hydrochloride        | 46386670  | 2387 | 15091 | 15.817 | 0.272  | 3463 | 16103 | 21.505 | 0.054  | 0.163  |
| Moxonidine hydrochloride          | 46386777  | 2092 | 15165 | 13.795 | -0.086 | 3549 | 14895 | 23.827 | 0.571  | 0.242  |
| Mupirocin                         | 104170118 | 1230 | 12303 | 9.998  | -0.080 | 3098 | 14713 | 21.056 | 0.187  | 0.053  |
| Nabumetone                        | 104170077 | 1711 | 15624 | 10.951 | 0.506  | 3813 | 17857 | 21.353 | -0.189 | 0.158  |
| Nadolol                           | 104169962 | 1093 | 12526 | 8.726  | -0.714 | 3539 | 17585 | 20.125 | -0.543 | -0.628 |
| Nafadotride                       | 46387001  | 2950 | 16965 | 17.389 | 0.550  | 4479 | 17769 | 25.207 | 0.878  | 0.714  |
| Nafcillin sodium                  | 104170104 | 1637 | 15770 | 10.380 | 0.004  | 3884 | 17309 | 22.439 | 0.288  | 0.146  |
| Naftopidil                        | 46386715  | 996  | 10819 | 9.206  | -0.281 | 3309 | 15065 | 21.965 | 0.182  | -0.050 |
| Nalbuphine hydrochloride          | 46386933  | 3352 | 16951 | 19.775 | 0.187  | 4136 | 16276 | 25.412 | -0.250 | -0.031 |
| Nalidixic acid                    | 104169992 | 3257 | 17801 | 18.297 | 0.027  | 4096 | 15730 | 26.039 | -0.321 | -0.147 |
| Naloxone hydrochloride            | 104170085 | 1379 | 14336 | 9.619  | -0.473 | 3329 | 16673 | 19.966 | -0.584 | -0.528 |
| Naltrexone hydrochloride          | 104170191 | 1573 | 16392 | 9.596  | -0.293 | 3591 | 18256 | 19.670 | -0.332 | -0.313 |
| Naltrindole hydrochloride hydrate | 46386854  | 1887 | 13284 | 14.205 | -2.280 | 3098 | 13194 | 23.480 | -0.911 | -1.596 |
| Naphazoline hydrochloride         | 104170021 | 1552 | 14086 | 11.018 | 0.555  | 3902 | 16854 | 23.152 | 0.493  | 0.524  |
| Naproxen sodium                   | 46386948  | 2504 | 13207 | 18.960 | 0.009  | 3287 | 12189 | 26.967 | -0.086 | -0.038 |
| Nateglinone                       | 46386701  | 1765 | 16319 | 10.816 | 0.355  | 3462 | 16807 | 20.599 | 0.015  | 0.185  |
| Nefazodone hydrochloride          | 46386669  | 2322 | 15117 | 15.360 | 0.191  | 3663 | 15362 | 23.845 | 0.575  | 0.383  |
| Nelfinavir mesylate               | 46386712  | 2036 | 16117 | 12.633 | -0.292 | 3297 | 17605 | 18.728 | -0.565 | -0.428 |
| Nevirapine                        | 46386569  | 2403 | 17356 | 13.845 | -0.451 | 2678 | 12409 | 21.581 | 0.489  | 0.019  |
| Nialamide                         | 46386894  | 3320 | 17024 | 19.502 | 0.184  | 4245 | 16216 | 26.178 | -0.323 | -0.070 |
| Nicardipine hydrochloride         | 104170076 | 949  | 10972 | 8.649  | -0.755 | 3040 | 14564 | 20.873 | -0.327 | -0.541 |
| Nicorandil                        | 46386683  | 2717 | 15586 | 17.432 | -0.482 | 4311 | 16079 | 26.811 | -0.133 | -0.308 |
| Nicotinamide                      | 46386893  | 1704 | 16231 | 10.498 | 0.078  | 3655 | 17408 | 20.996 | -0.221 | -0.072 |
| Nicotine                          | 104170075 | 895  | 10335 | 8.660  | -0.750 | 2901 | 14876 | 19.501 | -0.722 | -0.736 |
| Nicotinic acid                    | 104170022 | 3113 | 17453 | 17.836 | -0.122 | 4345 | 15782 | 27.531 | 0.036  | -0.043 |
| Nifedipine                        | 46386790  | 3507 | 17467 | 20.078 | 0.321  | 4537 | 17746 | 25.566 | -0.197 | 0.062  |
| Nifekalant hydrochloride          | 46386697  | 1956 | 14403 | 13.581 | -0.124 | 3278 | 15699 | 20.880 | -0.085 | -0.105 |
| Nimetazepam                       | 46386768  | 1400 | 14294 | 9.794  | -0.010 | 3564 | 16891 | 21.100 | -0.044 | -0.027 |
| Nimodipine                        | 46386964  | 2398 | 14611 | 16.412 | 0.380  | 3062 | 12963 | 23.621 | 1.184  | 0.782  |
| Nisoldipine                       | 46386699  | 1099 | 10292 | 10.678 | 0.191  | 3201 | 13652 | 23.447 | 0.643  | 0.417  |
| Nitazoxanide                      | 46386689  | 1162 | 16086 | 7.224  | -1.972 | 2814 | 16695 | 16.855 | -1.682 | -1.827 |
| Nitrazepam                        | 46386691  | 2520 | 13585 | 18.550 | 0.108  | 3560 | 12928 | 27.537 | 0.037  | 0.073  |
| Nitrendipine                      | 46386549  | 1097 | 13063 | 8.398  | -0.654 | 3421 | 16311 | 20.974 | -0.077 | -0.366 |
| Nitrofurantoin                    | 104170019 | 3189 | 18074 | 17.644 | -0.184 | 3982 | 15196 | 26.204 | -0.282 | -0.233 |
| Nizatidine                        | 46386765  | 3087 | 15604 | 19.783 | 0.274  | 4068 | 16131 | 25.219 | -0.611 | -0.168 |
| Nobiletin                         | 46386719  | 3907 | 15309 | 25.521 | 2.121  | 5503 | 14526 | 37.884 | 3.191  | 2.656  |
| Norfloxacin                       | 104169961 | 1591 | 15487 | 10.273 | 0.067  | 3431 | 16647 | 20.610 | 0.020  | 0.043  |

|                                 |           |      |       |        |        |      |       |        |        |        |
|---------------------------------|-----------|------|-------|--------|--------|------|-------|--------|--------|--------|
| Nornicotine                     | 46386896  | 2192 | 16608 | 13.198 | -0.192 | 3567 | 17093 | 20.868 | -0.088 | -0.140 |
| Nortriptyline hydrochloride     | 104170020 | 1231 | 14551 | 8.460  | -0.626 | 3002 | 17635 | 17.023 | -1.112 | -0.869 |
| Ofloxacin                       | 104169964 | 1633 | 15865 | 10.293 | 0.145  | 3741 | 17590 | 21.268 | -0.214 | -0.034 |
| Olanzapine                      | 46386668  | 3271 | 16989 | 19.254 | 1.299  | 2913 | 14465 | 20.138 | -0.003 | 0.648  |
| Oligomycin A                    |           | 3757 | 15432 | 24.346 | 2.212  | 6101 | 14923 | 40.883 | 5.050  | 3.631  |
| Olmesartan medoxomil            | 46386651  | 3174 | 17601 | 18.033 | 0.904  | 3379 | 16568 | 20.395 | 0.084  | 0.494  |
| Olopatadine hydrochloride       | 46386826  | 2175 | 14717 | 14.779 | -0.149 | 2887 | 12864 | 22.442 | 0.782  | 0.317  |
| Omeprazole                      | 46386973  | 1295 | 13231 | 9.788  | -0.013 | 3563 | 16519 | 21.569 | 0.079  | 0.033  |
| Ondansetron                     | 104170204 | 1905 | 12399 | 15.364 | 2.774  | 3981 | 14475 | 27.503 | 2.599  | 2.687  |
| Orlistat                        | 46386654  | 2079 | 17662 | 11.771 | -1.122 | 2629 | 15259 | 17.229 | -0.995 | -1.059 |
| Ormetoprim                      | 46386708  | 1491 | 14448 | 10.320 | -0.034 | 3849 | 16375 | 23.505 | 0.664  | 0.315  |
| Ornidazole                      | 46386947  | 3046 | 16179 | 18.827 | -0.034 | 3983 | 14968 | 26.610 | -0.193 | -0.113 |
| Orphenadrine hydrochloride      | 104169963 | 1558 | 15614 | 9.978  | -0.027 | 4009 | 17421 | 23.012 | 0.289  | 0.131  |
| Otezepad                        | 46386986  | 2222 | 17083 | 13.007 | -0.722 | 2887 | 15329 | 18.834 | -0.448 | -0.585 |
| Oxacillin sodium                | 104170106 | 1079 | 11166 | 9.663  | -0.200 | 3015 | 14690 | 20.524 | -0.428 | -0.314 |
| Oxaprozin                       | 46386783  | 1453 | 14267 | 10.184 | 0.170  | 3710 | 16752 | 22.147 | 0.230  | 0.200  |
| Oxcarbazepine                   | 46386767  | 2604 | 16942 | 15.370 | 0.043  | 3366 | 16383 | 20.546 | 0.136  | 0.089  |
| Oxiconazole nitrate             | 46386704  | 2120 | 16329 | 12.983 | 1.634  | 4114 | 17076 | 24.092 | 0.871  | 1.252  |
| Oxybutynin hydrochloride        | 104170078 | 950  | 10749 | 8.838  | -0.652 | 3296 | 14965 | 22.025 | 0.004  | -0.324 |
| Oxymetholone                    | 46386778  | 2604 | 14169 | 18.378 | 0.053  | 3143 | 11712 | 26.836 | -0.131 | -0.039 |
| Oxyphenonium bromide            | 46386961  | 2325 | 16919 | 13.742 | -0.096 | 3394 | 17348 | 19.564 | -0.379 | -0.237 |
| Oxytetracycline hydrochloride   | 104170024 | 1497 | 15288 | 9.792  | -0.189 | 3528 | 17357 | 20.326 | -0.087 | -0.138 |
| Ozagrel hydrochloride           | 46386611  | 2084 | 14966 | 13.925 | -0.063 | 3442 | 16273 | 21.152 | -0.025 | -0.044 |
| P1075                           | 46386997  | 2710 | 17582 | 15.413 | 0.057  | 3597 | 13836 | 25.997 | 1.994  | 1.025  |
| Palonosetron hydrochloride      | 46386820  | 3454 | 13106 | 26.354 | 2.389  | 4329 | 11915 | 36.332 | 2.726  | 2.557  |
| Pancuronium dibromide           | 46386853  | 2145 | 15812 | 13.566 | -0.127 | 3535 | 17381 | 20.338 | -0.206 | -0.166 |
| Pantoprazole sodium             | 46386609  | 2629 | 17593 | 14.943 | -0.095 | 3220 | 15939 | 20.202 | 0.018  | -0.039 |
| Parecoxib sodium                | 46386785  | 2528 | 13729 | 18.414 | -0.167 | 3220 | 11854 | 27.164 | -0.027 | -0.097 |
| Paroxetine maleate              | 46386841  | 3473 | 14164 | 24.520 | 2.289  | 4472 | 13503 | 33.119 | 2.391  | 2.340  |
| Pazufloxacin                    | 46386755  | 3116 | 17247 | 18.067 | -0.278 | 4340 | 16413 | 26.442 | -0.244 | -0.261 |
| PD 81723                        | 46386976  | 2989 | 15383 | 19.431 | 0.161  | 3931 | 14548 | 27.021 | -0.070 | 0.045  |
| Pefloxacin mesylate             | 46386589  | 2281 | 16844 | 13.542 | -0.131 | 3642 | 17396 | 20.936 | -0.073 | -0.102 |
| Pemolide                        | 46386687  | 3384 | 17585 | 19.244 | -0.048 | 4288 | 17515 | 24.482 | -0.568 | -0.308 |
| Penciclovir                     | 46386598  | 2215 | 16122 | 13.739 | -0.096 | 3430 | 17252 | 19.882 | -0.308 | -0.202 |
| Penicillin G potassium          | 104170081 | 1504 | 15172 | 9.913  | -0.063 | 3932 | 17908 | 21.957 | -0.015 | -0.039 |
| Penicillin V                    | 104170199 | 1552 | 15104 | 10.275 | 0.136  | 3702 | 16969 | 21.816 | -0.056 | 0.040  |
| Pentoxifylline                  | 46386861  | 2208 | 16236 | 13.599 | -0.121 | 3602 | 17495 | 20.589 | -0.150 | -0.136 |
| Pergolide mesylate              | 46386979  | 3319 | 17667 | 18.786 | -0.047 | 4655 | 16289 | 28.578 | 0.397  | 0.175  |
| Perospirone hydrochloride       | 46386671  | 2604 | 16405 | 15.873 | 0.282  | 4834 | 17151 | 28.185 | 1.541  | 0.912  |
| Perphenazine                    | 104169970 | 1055 | 15197 | 6.942  | -1.704 | 2645 | 16662 | 15.874 | -1.753 | -1.729 |
| Phenelzine sulfate              | 46386907  | 3451 | 15941 | 21.649 | 1.017  | 4143 | 15468 | 26.784 | 0.221  | 0.619  |
| Phenothiazine                   | 46386888  | 1134 | 10975 | 10.333 | -0.026 | 3034 | 14137 | 21.461 | -0.057 | -0.041 |
| Phenoxybenzamine hydrochloride  | 104170096 | 1596 | 15233 | 10.477 | 0.246  | 3768 | 17131 | 21.995 | -0.004 | 0.121  |
| Phenprobamate                   | 46386753  | 1547 | 14819 | 10.439 | 0.041  | 3616 | 16843 | 21.469 | -0.054 | -0.007 |
| Phentolamine mono-hydrochloride | 104170130 | 1865 | 16458 | 11.332 | 0.630  | 3682 | 17287 | 21.299 | 0.278  | 0.454  |
| Phylloquinone                   | 104170094 | 1429 | 13002 | 10.991 | 0.448  | 3191 | 14727 | 21.668 | 0.415  | 0.432  |
| Physostigmine hemisulfate       | 46386842  | 2271 | 16531 | 13.738 | -0.096 | 3688 | 17537 | 21.030 | -0.052 | -0.074 |
| Piceid                          | 46386700  | 1090 | 11519 | 9.463  | -0.571 | 3212 | 14860 | 21.615 | -0.003 | -0.287 |
| Picrotin - Picrotoxinin         | 46386843  | 2324 | 17242 | 13.479 | -0.569 | 3144 | 16076 | 19.557 | -0.201 | -0.385 |
| Pidotimod                       | 46386775  | 2951 | 16971 | 17.388 | 0.696  | 3041 | 15615 | 19.475 | -0.229 | 0.233  |
| Pilocarpine hydrochloride       | 46386789  | 3026 | 16634 | 18.192 | -0.238 | 4383 | 16737 | 26.187 | -0.320 | -0.279 |
| Pinacidil monohydrate           | 46387019  | 1383 | 14649 | 9.441  | -0.173 | 3727 | 16977 | 21.953 | 0.179  | 0.003  |
| Pindolol                        | 104169965 | 1476 | 16390 | 9.005  | -0.560 | 3651 | 17465 | 20.905 | -0.318 | -0.439 |
| Pioglitazone hydrochloride      | 46386618  | 2438 | 15553 | 15.553 | 0.225  | 3424 | 15468 | 22.136 | 0.194  | 0.210  |
| Piperacilin sodium              | 104169975 | 1693 | 16334 | 10.365 | -0.006 | 3702 | 17114 | 21.631 | 0.003  | -0.001 |
| Pireperone                      | 46386967  | 1645 | 14160 | 11.617 | 0.831  | 4142 | 16094 | 25.736 | 1.170  | 1.001  |
| Piribedil hydrochloride         | 46386844  | 2441 | 16388 | 14.895 | 0.108  | 3423 | 16891 | 20.265 | -0.222 | -0.057 |
| Piroxicam                       | 46386918  | 1475 | 14744 | 10.004 | 0.087  | 3713 | 16839 | 22.050 | 0.205  | 0.146  |
| Pizotiline maleate              | 46386908  | 1999 | 16024 | 12.475 | -0.320 | 3105 | 16837 | 18.442 | -0.629 | -0.474 |
| Podofilox                       | 104170173 | 320  | 8761  | 3.653  | -3.454 | 804  | 7388  | 10.883 | -3.622 | -3.538 |
| Pralidoxime chloride            | 104170029 | 1621 | 15961 | 10.156 | 0.005  | 3546 | 17686 | 20.050 | -0.190 | -0.093 |
| Pramipexole                     | 46386856  | 2401 | 13318 | 18.028 | -0.586 | 3433 | 12527 | 27.405 | 0.433  | -0.077 |
| Pravastatin sodium              | 46386713  | 3044 | 15724 | 19.359 | 0.138  | 4143 | 14664 | 28.253 | 0.300  | 0.219  |
| Praziquantel                    | 104169966 | 3130 | 17786 | 17.598 | -0.198 | 4048 | 15347 | 26.376 | -0.240 | -0.219 |
| Prazosin hydrochloride hydrate  | 46386845  | 3629 | 16094 | 22.549 | 1.416  | 4540 | 15725 | 28.871 | 0.936  | 1.176  |
| Prednisolone                    | 104169971 | 1662 | 13821 | 12.025 | 1.094  | 3835 | 14856 | 25.814 | 1.096  | 1.095  |
| Prednisolone acetate            | 104169968 | 3297 | 15429 | 21.369 | 1.016  | 4083 | 13372 | 30.534 | 0.755  | 0.885  |
| Prednisolone sodium succinate   | 46386971  | 2927 | 13113 | 22.321 | 1.322  | 3615 | 11535 | 31.339 | 0.947  | 1.135  |
| Prednisone                      | 104169973 | 1758 | 16554 | 10.620 | 0.324  | 4033 | 17689 | 22.799 | 0.227  | 0.276  |
| Prilocaine hydrochloride        | 104169972 | 1673 | 15884 | 10.533 | 0.277  | 3951 | 17328 | 22.801 | 0.228  | 0.252  |
| Primaquine diphosphate          | 104170105 | 2640 | 16035 | 16.464 | -0.564 | 3702 | 15673 | 23.620 | -0.900 | -0.732 |
| Primidone                       | 104170030 | 1703 | 16729 | 10.180 | 0.017  | 3647 | 17734 | 20.565 | 0.003  | 0.010  |
| Priscoline hydrochloride        | 104170110 | 1021 | 10455 | 9.766  | -0.144 | 3263 | 14392 | 22.672 | 0.191  | 0.023  |
| Probencid                       | 104170028 | 1796 | 16240 | 11.059 | 0.565  | 3519 | 16280 | 21.615 | -0.114 | 0.226  |
| Procanamide hydrochloride       | 104170033 | 2885 | 13376 | 21.568 | 1.080  | 3456 | 12776 | 27.051 | -0.079 | 0.500  |
| Procaine hydrochloride          | 104170025 | 1712 | 15274 | 11.209 | 0.564  | 3722 | 16703 | 22.283 | 0.646  | 0.605  |
| Procabazine hydrochloride       | 46386582  | 3363 | 16957 | 19.833 | 0.213  | 4485 | 17121 | 26.196 | 0.019  | 0.116  |
| Prochlorperazine maleate        | 46386924  | 1940 | 16467 | 11.781 | -0.443 | 3026 | 17183 | 17.610 | -0.814 | -0.628 |
| Procyclidine hydrochloride      | 104170083 | 1732 | 16626 | 10.417 | 0.213  | 4199 | 17681 | 23.749 | 0.501  | 0.357  |
| Procyteine                      | 46386866  | 1520 | 14734 | 10.316 | 0.231  | 3593 | 16817 | 21.365 | 0.025  | 0.128  |
| Progesterone                    | 46386909  | 2417 | 16312 | 14.817 | 0.095  | 3619 | 16449 | 22.001 | 0.164  | 0.129  |
| Promethazine hydrochloride      | 104169969 | 1178 | 14176 | 8.310  | -0.942 | 3344 | 16771 | 19.939 | -0.596 | -0.769 |
| Propafenone                     | 104170080 | 1517 | 15143 | 10.018 | -0.006 | 4012 | 17509 | 22.914 | 0.260  | 0.127  |
| Propantheline bromide           | 104170027 | 1582 | 15486 | 10.216 | 0.036  | 3682 | 17648 | 20.864 | 0.114  | 0.075  |
| Propofol                        | 104169947 | 1830 | 15100 | 12.119 | 1.093  | 3959 | 16763 | 23.617 | 0.703  | 0.898  |
| Propranolol hydrochloride       | 104170185 | 1855 | 14514 | 12.781 | 1.507  | 4212 | 16599 | 25.375 | 1.323  | 1.415  |

|                                  |           |      |       |        |        |      |       |        |        |        |
|----------------------------------|-----------|------|-------|--------|--------|------|-------|--------|--------|--------|
| Propylthiouracil                 | 104170031 | 1692 | 16488 | 10.262 | 0.061  | 3634 | 18081 | 20.098 | -0.172 | -0.056 |
| Prostaglandin E1                 | 46386879  | 1063 | 11375 | 9.345  | -0.644 | 2974 | 14510 | 20.496 | -0.398 | -0.521 |
| Proxymetacaine                   | 104170084 | 1106 | 10372 | 10.663 | 0.348  | 3328 | 14522 | 22.917 | 0.261  | 0.305  |
| Pterostilbene                    | 46386623  | 2289 | 15874 | 14.420 | -0.265 | 2693 | 14379 | 18.729 | -0.484 | -0.374 |
| Pyrazinamide                     | 104170032 | 1369 | 14359 | 9.534  | -0.271 | 3800 | 17040 | 22.300 | 0.084  | -0.093 |
| Pyridostigmine bromide           | 104170079 | 1599 | 15678 | 10.199 | 0.094  | 4027 | 17874 | 22.530 | 0.150  | 0.122  |
| Pyrimethamine                    | 104170026 | 922  | 14910 | 6.184  | -2.108 | 2532 | 16506 | 15.340 | -1.953 | -2.030 |
| Quetiapine fumarate              | 46386812  | 3284 | 17269 | 19.017 | -0.149 | 4498 | 17158 | 26.215 | 0.026  | -0.061 |
| Quinapril hydrochloride          | 104170220 | 1558 | 14674 | 10.617 | 0.250  | 3412 | 16349 | 20.870 | 0.117  | 0.183  |
| Quinidine                        | 104169976 | 1382 | 14939 | 9.251  | -0.703 | 3793 | 17266 | 21.968 | 0.122  | -0.291 |
| R(+)-SCH-23390 hydrochloride     | 46387007  | 3418 | 16212 | 21.083 | 0.767  | 4412 | 15795 | 27.933 | 0.614  | 0.690  |
| Rabeprazole                      | 46386636  | 1537 | 14361 | 10.703 | 0.409  | 3644 | 17186 | 21.203 | -0.017 | 0.196  |
| Racecadotril                     | 46386930  | 1380 | 14510 | 9.511  | -0.141 | 3292 | 16946 | 19.426 | -0.482 | -0.312 |
| Racepinephrine                   | 104170169 | 2693 | 16170 | 16.654 | -0.502 | 3921 | 14187 | 27.638 | 0.061  | -0.220 |
| Raclopride                       | 46386981  | 2553 | 13726 | 18.600 | -0.333 | 3711 | 13507 | 27.475 | 0.457  | 0.062  |
| Raloxifene hydrochloride         | 104170163 | 1046 | 15617 | 6.698  | -2.302 | 1913 | 17668 | 10.827 | -3.808 | -3.055 |
| Raltitrexed                      | 46386823  | 2859 | 15993 | 17.877 | -0.339 | 4071 | 14890 | 27.340 | 0.026  | -0.157 |
| Ramipril                         | 46386770  | 2560 | 17448 | 14.672 | -0.183 | 3105 | 15843 | 19.599 | -0.187 | -0.185 |
| Ranitidine hydrochloride         | 104169977 | 2407 | 14211 | 16.938 | -0.411 | 3450 | 12601 | 27.379 | -0.001 | -0.206 |
| Ranolazine dihydrochloride       | 46386552  | 3242 | 16939 | 19.139 | -0.094 | 4279 | 16614 | 25.755 | -0.132 | -0.113 |
| Remacemide hydrochloride         | 46386987  | 3053 | 15769 | 19.361 | 0.004  | 4167 | 15840 | 26.307 | 0.057  | 0.030  |
| Repaglinide                      | 46386564  | 1142 | 13794 | 8.279  | -0.709 | 2659 | 16437 | 16.177 | -1.333 | -1.021 |
| Resveratrol                      | 46386962  | 1290 | 13845 | 9.317  | -0.661 | 3226 | 16752 | 19.257 | -0.834 | -0.748 |
| Ribavirin                        | 104170186 | 1278 | 14872 | 8.593  | -0.826 | 3259 | 17194 | 18.954 | -0.600 | -0.713 |
| Rifabutin                        | 104170218 | 1300 | 14619 | 8.893  | -0.927 | 3630 | 16928 | 21.444 | -0.063 | -0.495 |
| Rifampicin                       | 104169978 | 2989 | 17337 | 17.241 | -0.313 | 3718 | 14201 | 26.181 | -0.287 | -0.300 |
| Rifapentine                      | 104170198 | 1007 | 10807 | 9.318  | -0.389 | 2901 | 14319 | 20.260 | -0.504 | -0.447 |
| Rifaximin                        | 46386615  | 3054 | 16569 | 18.432 | -0.161 | 4036 | 14831 | 27.213 | -0.012 | -0.086 |
| Riluzole hydrochloride           | 46386847  | 2538 | 16881 | 15.035 | 0.133  | 3737 | 17568 | 21.272 | 0.002  | 0.067  |
| Rimcazole dihydrochloride        | 46387003  | 2230 | 13542 | 16.467 | -1.278 | 3292 | 12812 | 25.695 | -0.153 | -0.715 |
| Risperidone                      | 46386613  | 3150 | 14530 | 21.679 | 2.084  | 2838 | 11664 | 24.331 | 1.426  | 1.755  |
| Ritonavir                        | 46386817  | 2855 | 17818 | 16.023 | -1.475 | 3533 | 17545 | 20.137 | -2.056 | -1.766 |
| Rizatriptan benzoate             | 46386632  | 2562 | 17169 | 14.922 | -0.102 | 3116 | 15757 | 19.775 | -0.127 | -0.115 |
| Rofecoxib                        | 46386634  | 2871 | 17828 | 16.104 | 0.280  | 3170 | 16115 | 19.671 | -0.163 | 0.059  |
| Rolipram                         | 46386779  | 1524 | 14765 | 10.322 | 0.233  | 3619 | 16418 | 22.043 | 0.203  | 0.218  |
| Rolitetracycline                 | 46386966  | 1496 | 15066 | 9.930  | 0.053  | 3476 | 16277 | 21.355 | 0.023  | 0.038  |
| Ropivacaine hydrochloride        | 46386542  | 2208 | 16518 | 13.367 | -0.162 | 3732 | 17237 | 21.651 | 0.086  | -0.038 |
| Rosiglitazone maleate            | 46386628  | 2398 | 16297 | 14.714 | 0.076  | 3493 | 16880 | 20.693 | -0.127 | -0.025 |
| Roxatidine acetate hydrochloride | 46386565  | 3278 | 16946 | 19.344 | -0.004 | 4162 | 16350 | 25.456 | -0.234 | -0.119 |
| Ru 24969 hemisuccinate           | 46387004  | 1340 | 15946 | 8.403  | -0.927 | 3019 | 16410 | 18.397 | -0.809 | -0.868 |
| RU-486                           | 46386955  | 1977 | 14380 | 13.748 | 1.815  | 4386 | 16709 | 26.249 | 1.304  | 1.560  |
| Rufloxacin hydrochloride         | 46386706  | 1713 | 16054 | 10.670 | 0.186  | 3576 | 16834 | 21.243 | -0.134 | 0.026  |
| Rutin                            | 46386546  | 1570 | 14312 | 10.970 | 0.533  | 3663 | 17247 | 21.238 | -0.008 | 0.262  |
| S(-)-Timolol maleate             | 104170090 | 1186 | 15171 | 7.818  | -1.211 | 3368 | 17273 | 19.499 | -0.723 | -0.967 |
| Salbutamol sulfate               | 46386798  | 3081 | 16958 | 18.168 | -0.524 | 4078 | 16022 | 25.453 | -0.236 | -0.380 |
| Salmeterol                       | 46387005  | 3932 | 16830 | 23.363 | 1.426  | 5369 | 15969 | 33.621 | 1.912  | 1.669  |
| Saquinavir mesylate              | 46386596  | 1028 | 11797 | 8.714  | -0.508 | 2761 | 14800 | 18.655 | -0.684 | -0.596 |
| SB 205607 dihydrobromide         | 46387006  | 1569 | 15977 | 9.820  | -0.347 | 3654 | 16891 | 21.633 | 0.003  | -0.172 |
| Scopolamine hydrobromide         | 46386794  | 3427 | 17359 | 19.742 | 0.173  | 4359 | 17373 | 25.091 | -0.359 | -0.093 |
| SDM25N hydrochloride             | 46387008  | 2979 | 17100 | 17.421 | -0.486 | 4339 | 16406 | 26.448 | -0.242 | -0.364 |
| Secnidazole                      | 46386696  | 1746 | 15844 | 11.020 | 0.405  | 3733 | 17322 | 21.551 | -0.026 | 0.189  |
| Secoisolaricresinol              | 46386735  | 1458 | 13974 | 10.434 | 0.038  | 3347 | 16604 | 20.158 | -0.517 | -0.240 |
| Selegiline hydrochloride         | 46386796  | 2350 | 13036 | 18.027 | -0.587 | 3497 | 13079 | 26.738 | 0.205  | -0.191 |
| Sertraline hydrochloride         | 46386723  | 2237 | 16368 | 13.667 | -0.109 | 2913 | 15567 | 18.713 | -0.568 | -0.339 |
| Sibutramine                      | 46387014  | 2466 | 12702 | 19.414 | 0.155  | 3423 | 11946 | 28.654 | 0.420  | 0.288  |
| Simvastatin                      | 104170217 | 1690 | 11344 | 14.898 | 2.526  | 3864 | 13138 | 29.411 | 3.314  | 2.920  |
| SKF 83566 hydrobromide           | 46386977  | 2623 | 13698 | 19.149 | 0.070  | 3247 | 12551 | 25.870 | -0.415 | -0.173 |
| Sotalol hydrochloride            | 46386705  | 994  | 12766 | 7.786  | -1.256 | 2828 | 14875 | 19.012 | -0.579 | -0.917 |
| Spectinomycin                    | 104170086 | 1558 | 15275 | 10.200 | 0.028  | 3419 | 16948 | 20.173 | -0.144 | -0.058 |
| Spironolactone                   | 104169980 | 3559 | 17775 | 20.023 | 0.582  | 4313 | 15310 | 28.171 | 0.189  | 0.386  |
| SR 57227A                        | 46386849  | 3122 | 14100 | 22.142 | 1.265  | 3841 | 11538 | 33.290 | 1.414  | 1.339  |
| Stanozolol                       | 46386608  | 1420 | 14654 | 9.690  | -0.058 | 3527 | 16573 | 21.282 | 0.003  | -0.027 |
| Stavudine                        | 104170182 | 1666 | 16195 | 10.287 | 0.074  | 3627 | 17492 | 20.735 | 0.066  | 0.070  |
| Stiripentol                      | 46386912  | 2535 | 13383 | 18.942 | 0.003  | 3212 | 11469 | 28.006 | 0.226  | 0.115  |
| Sulfacetamide                    | 104170036 | 1330 | 14263 | 9.325  | -0.657 | 3553 | 16505 | 21.527 | -0.034 | -0.345 |
| Sulfamethoxazole                 | 104170035 | 1202 | 12196 | 9.856  | -0.155 | 3118 | 14844 | 21.005 | 0.167  | 0.006  |
| Sulfasalazine                    | 46386548  | 1169 | 12177 | 9.600  | -0.291 | 3075 | 15203 | 20.226 | -0.124 | -0.208 |
| Sulfipyrazone                    | 104170037 | 3187 | 17668 | 18.038 | -0.057 | 4024 | 15001 | 26.825 | -0.133 | -0.095 |
| Sulfisoxazole                    | 104170034 | 1664 | 15482 | 10.748 | 0.430  | 3567 | 17416 | 20.481 | -0.206 | 0.112  |
| Sulindac                         | 104170038 | 2907 | 16240 | 17.900 | -0.101 | 4473 | 15659 | 28.565 | 0.283  | 0.091  |
| Sumatriptan succinate            | 46386597  | 3085 | 16273 | 18.958 | -0.175 | 4414 | 15767 | 27.995 | 0.635  | 0.230  |
| Symmetrel                        | 104169987 | 1681 | 15161 | 11.088 | 0.500  | 3475 | 16645 | 20.877 | 0.120  | 0.310  |
| Synephrine                       | 46386970  | 2437 | 13784 | 17.680 | -0.403 | 3363 | 12710 | 26.459 | -0.238 | -0.321 |
| Tacrine hydrochloride            | 46386852  | 3732 | 17594 | 21.212 | 0.824  | 4940 | 17100 | 28.889 | 0.942  | 0.883  |
| Tacrolimus                       | 46386734  | 3146 | 16500 | 19.067 | 0.044  | 4496 | 15822 | 28.416 | 0.349  | 0.196  |
| Tadalafil                        | 46386604  | 3112 | 16717 | 18.616 | 1.093  | 2909 | 14696 | 19.795 | -0.121 | 0.486  |
| Tamoxifen                        | 104170047 | 1006 | 11985 | 8.394  | -1.240 | 3307 | 14354 | 23.039 | 0.499  | -0.370 |
| Taxifolin(+)                     | 46386813  | 1326 | 13687 | 9.688  | -0.429 | 3453 | 16257 | 21.240 | -0.135 | -0.282 |
| Taxifolin(+/-)                   | 46386773  | 1464 | 14165 | 10.335 | 0.240  | 3446 | 16667 | 20.676 | -0.155 | 0.042  |
| Tegafur                          | 46386579  | 3440 | 17979 | 19.133 | 0.065  | 4433 | 16312 | 27.176 | -0.023 | 0.021  |
| Tegaserod maleate                | 46386624  | 2884 | 15161 | 19.022 | 0.839  | 4774 | 16273 | 29.337 | 1.798  | 1.318  |
| Telithromycin                    | 46386829  | 2638 | 14462 | 18.241 | 0.009  | 3334 | 11657 | 28.601 | 0.292  | 0.150  |
| Telmisartan                      | 46386620  | 2559 | 17608 | 14.533 | -0.228 | 3193 | 16050 | 19.894 | -0.087 | -0.157 |
| Temozolomide                     | 46386653  | 2601 | 14488 | 17.953 | 0.878  | 2338 | 11119 | 21.027 | 0.300  | 0.589  |
| Terazosin                        | 104170187 | 1590 | 15194 | 10.465 | 0.169  | 3708 | 16889 | 21.955 | 0.523  | 0.346  |
| Terbinafine hydrochloride        | 46386583  | 2625 | 16774 | 15.649 | 0.242  | 3876 | 17220 | 22.509 | 0.277  | 0.260  |

|                                 |           |                |          |        |        |                |       |        |        |        |
|---------------------------------|-----------|----------------|----------|--------|--------|----------------|-------|--------|--------|--------|
| Terbutaline sulfate             | 104170117 | 1185           | 13845    | 8.559  | -0.805 | 3520           | 16515 | 21.314 | -0.200 | -0.503 |
| Testosterone                    | 46501387  | 3083           | 15942    | 19.339 | 0.362  | 4621           | 15913 | 29.039 | 0.397  | 0.379  |
| Tetracycline                    | 104170039 | 1317           | 13660    | 9.641  | -0.081 | 3326           | 17446 | 19.065 | -0.577 | -0.329 |
| Tetrahydrozoline hydrochloride  | 104169982 | 1569           | 15620    | 10.045 | -0.055 | 3589           | 17082 | 21.010 | 0.169  | 0.057  |
| TFMPP hydrochloride             | 46386913  | 2776           | 15193    | 18.272 | 0.706  | 4452           | 16623 | 26.782 | 1.229  | 0.968  |
| Thalidomide                     | 104170098 | 3056           | 17304    | 17.661 | -0.178 | 4260           | 15542 | 27.410 | 0.007  | -0.086 |
| Theophylline                    | 104170040 | 2340           | 13772    | 16.991 | -0.394 | 3640           | 12757 | 28.533 | 0.276  | -0.059 |
| Thiabendazole                   | 104170091 | 1454           | 15011    | 9.686  | -0.187 | 3524           | 16796 | 20.981 | -0.296 | -0.242 |
| Thioridazine hydrochloride      | 104170092 | 980            | 12250    | 8.000  | -1.142 | 2805           | 14515 | 19.325 | -0.462 | -0.802 |
| Thiothixene                     | 104170208 | 854            | 14015    | 6.093  | -2.156 | 2142           | 17102 | 12.525 | -2.731 | -2.444 |
| Tiagabine hydrochloride         | 46386642  | 2472           | 17164    | 14.402 | -0.271 | 3047           | 15644 | 19.477 | -0.229 | -0.250 |
| Tibolone                        | 46386825  | 2910           | 15856    | 18.353 | -0.186 | 4019           | 14643 | 27.447 | 0.058  | -0.064 |
| Ticlopidine hydrochloride       | 46386576  | 2350           | 16262    | 14.451 | 0.030  | 3542           | 17227 | 20.561 | -0.157 | -0.063 |
| Tinidazole                      | 46387025  | 2500           | 17349    | 14.410 | -0.268 | 2935           | 14989 | 19.581 | -0.193 | -0.231 |
| Tizanidine hydrochloride        | 104170152 | 1058           | 11709    | 9.036  | -0.360 | 3210           | 14360 | 22.354 | 0.284  | -0.038 |
| Tocainide                       | 46386772  | 3464           | 17222    | 20.114 | 0.381  | 4181           | 16494 | 25.349 | -0.572 | -0.096 |
| Tolazamide                      | 104170088 | 1463           | 15447    | 9.471  | -0.305 | 3806           | 17247 | 22.068 | 0.017  | -0.144 |
| Tolbutamide                     | 104170041 | 3133           | 17717    | 17.684 | -0.171 | 3926           | 13413 | 29.270 | 0.452  | 0.141  |
| Tolterodine tartrate            | 46386674  | 2902           | 17078    | 16.993 | -1.045 | 4081           | 16476 | 24.769 | -0.470 | -0.757 |
| Topiramate                      | 46386619  | 2274           | 15093    | 15.067 | -0.056 | 2649           | 11856 | 22.343 | 0.748  | 0.346  |
| Topotecan hydrochloride         | 46386667  | 4461           | 12513    | 35.651 | 5.381  | 5830           | 12398 | 47.024 | 5.935  | 5.658  |
| Torasemide                      | 46386585  | 936            | 10973    | 8.530  | -1.154 | 3039           | 14409 | 21.091 | -0.188 | -0.671 |
| Toremifene citrate              | 46386786  | 1405           | 16753    | 8.387  | -0.936 | 3390           | 18027 | 18.805 | -0.656 | -0.796 |
| Tosufloxacin tosilate           | 46386743  | 2376           | 16863    | 14.090 | -0.034 | 3564           | 17194 | 20.728 | -0.119 | -0.077 |
| Tramadol hydrochloride          | 46386884  | 2592           | 13311    | 19.473 | 0.174  | 3529           | 12499 | 28.234 | 0.294  | 0.234  |
| Tranilast                       | 46386750  | 1721           | 15708    | 10.956 | 0.365  | 3745           | 16764 | 22.340 | 0.253  | 0.309  |
| trans-Retinoic acid             | 104169979 | 3058           | 16772    | 18.233 | 0.006  | 4027           | 14713 | 27.370 | -0.003 | 0.002  |
| Trazodone hydrochloride         | 46386915  | 3217           | 16195    | 19.864 | 0.227  | 4338           | 16068 | 26.998 | 0.294  | 0.260  |
| Tremulacin                      | 46386886  | 2448           | 16520    | 14.818 | -0.136 | 3115           | 15056 | 20.689 | 0.185  | 0.024  |
| Triamcinolone acetonide         | 104170089 | 1962           | 13954    | 14.060 | 2.210  | 4054           | 15871 | 25.543 | 1.018  | 1.614  |
| Triamterene                     | 104170042 | 1865           | 13202    | 14.127 | -1.316 | 2871           | 12551 | 22.875 | -1.079 | -1.197 |
| Triclabendazole                 | 46386738  | 2940           | 17290    | 17.004 | 0.571  | 3692           | 15958 | 23.136 | 1.019  | 0.795  |
| Triclosan                       | 104170014 | 3053           | 16187    | 18.861 | 0.208  | 4372           | 15365 | 28.454 | 0.257  | 0.233  |
| Trifluoperazine hydrochloride   | 46386916  | 3016           | 17709    | 17.031 | -1.028 | 4129           | 17714 | 23.309 | -0.970 | -0.999 |
| Trihexyphenidyl hydrochloride   | 104169984 | 1711           | 16545    | 10.341 | 0.103  | 3794           | 17277 | 21.960 | 0.525  | 0.314  |
| Trimebutine maleate             | 46386760  | 2430           | 16650    | 14.595 | 0.055  | 4057           | 17332 | 23.408 | 0.477  | 0.266  |
| Trimethoprim                    | 104169981 | 1356           | 12749    | 10.636 | 0.260  | 3305           | 15101 | 21.886 | 0.497  | 0.379  |
| Tripeleminamine hydrochloride   | 46386917  | 2664           | 13799    | 19.306 | 0.121  | 3651           | 13094 | 27.883 | 0.189  | 0.155  |
| Triptolide                      | 46386571  | 1437           | 10256    | 14.011 | -0.397 | 1783           | 8725  | 20.436 | 0.098  | -0.150 |
| Tropicamide                     | 104170087 | 1678           | 15492    | 10.831 | 0.440  | 3887           | 17744 | 21.906 | -0.030 | 0.205  |
| Tropisetron hydrochloride       | 46386594  | 3124           | 16580    | 18.842 | 0.807  | 4988           | 16565 | 30.112 | 1.971  | 1.389  |
| Troxipide                       | 46386769  | 1665           | 14985    | 11.111 | 0.462  | 3683           | 17262 | 21.336 | -0.101 | 0.180  |
| Tryptoline                      | 46386936  | 3212           | 15933    | 20.159 | 0.395  | 4199           | 14602 | 28.756 | 0.451  | 0.423  |
| Urapidil hydrochloride          | 46386851  | 2421           | 17429    | 13.891 | -0.069 | 3411           | 17027 | 20.033 | -0.274 | -0.172 |
| Ursodeoxycholic acid            | 104169985 | 1083           | 11009    | 9.837  | 0.010  | 3161           | 14847 | 21.290 | 0.006  | 0.008  |
| Valaciclovir hydrochloride      | 46386762  | 3128           | 16498    | 18.960 | -0.174 | 4126           | 15790 | 26.130 | -0.003 | -0.089 |
| Valdecoxib                      | 46386621  | 3437           | 17135    | 20.058 | 0.363  | 4567           | 16618 | 27.482 | 0.069  | 0.216  |
| Valproic acid                   | 104170082 | 1077           | 12163    | 8.855  | -0.643 | 2982           | 14542 | 20.506 | -0.433 | -0.538 |
| Valsartan                       | 46386599  | 2288           | 16956    | 13.494 | -0.565 | 2901           | 14719 | 19.709 | -0.150 | -0.357 |
| Vardenafil citrate              | 46386591  | 2547           | 16503    | 15.434 | 0.204  | 3889           | 17197 | 22.614 | 0.301  | 0.252  |
| Vecuronium bromide              | 46386876  | 2419           | 13500    | 17.919 | -0.326 | 3544           | 12745 | 27.807 | 0.166  | -0.080 |
| Venlafaxine hydrochloride       | 46386590  | 2391           | 17054    | 14.020 | -0.046 | 3572           | 17125 | 20.858 | -0.090 | -0.068 |
| Verapamil hydrochloride         | 46386795  | 1570           | 14104    | 11.132 | 0.607  | 4102           | 16332 | 25.116 | 1.008  | 0.807  |
| Vidarabine                      | 104170045 | 2987           | 15282    | 19.546 | 0.429  | 3879           | 13458 | 28.823 | 0.345  | 0.387  |
| Vincristine sulfate             | 46386588  | 334            | 7110     | 4.698  | -2.362 | 905            | 7266  | 12.455 | -2.308 | -2.335 |
| Vindesine sulfate               | 46386586  | 425            | 4236     | 10.033 | -2.864 | 969            | 3806  | 25.460 | -0.539 | -1.701 |
| Vinorelbine tartrate            | 46386815  | 178            | 5376     | 3.311  | -3.859 | 392            | 6039  | 6.491  | -4.656 | -4.258 |
| Voriconazole                    | 46386721  | 3172           | 16602    | 19.106 | 0.056  | 4086           | 14879 | 27.462 | 0.062  | 0.059  |
| Warfarin sodium                 | 104169988 | 3081           | 16818    | 18.320 | 0.034  | 3781           | 14810 | 25.530 | -0.443 | -0.205 |
| Xanthinol nicotinate            | 46387024  | 2565           | 17528    | 14.634 | -0.196 | 3221           | 16020 | 20.106 | -0.014 | -0.105 |
| Zacopride hydrochloride hydrate | 46386978  | 1677           | 12745    | 13.158 | 1.542  | 4020           | 14439 | 27.841 | 1.721  | 1.632  |
| Zafirlukast                     | 46386595  | 2985           | 17268    | 17.286 | 0.663  | 3311           | 16305 | 20.307 | 0.054  | 0.358  |
| Zalcitabine                     | 46386814  | 3027           | 15660    | 19.330 | 0.128  | 4043           | 15062 | 26.842 | -0.123 | 0.002  |
| Zaleplon                        | 46386657  | 2696           | 14629    | 18.429 | 1.032  | 2428           | 12098 | 20.069 | -0.027 | 0.503  |
| Zardaverine                     | 46386923  | 1270           | 13809    | 9.197  | -0.737 | 3336           | 15681 | 21.274 | -0.123 | -0.430 |
| Zeranol                         | 46386627  | 2485           | 16889    | 14.714 | -0.170 | 3083           | 15778 | 19.540 | -0.207 | -0.189 |
| Zidovudine                      | 104170164 | 1734           | 16193    | 10.708 | 0.298  | 3433           | 17224 | 19.931 | -0.234 | 0.032  |
| Zileuton                        | 46386751  | 1178           | 12435    | 9.473  | -0.358 | 3004           | 14713 | 20.417 | -0.053 | -0.206 |
| Zolmitriptan                    | 46386880  | 2532           | 14212    | 17.816 | -0.128 | 3443           | 12175 | 28.279 | 0.215  | 0.043  |
| Zolpidem tartrate               | 46386567  | 3170           | 17097    | 18.541 | 0.105  | 3853           | 14399 | 26.759 | -0.149 | -0.022 |
| Zonisamide                      | 104170135 | 1429           | 13998    | 10.209 | 0.181  | 3540           | 16338 | 21.667 | 0.104  | 0.143  |
| Zucapsaicin                     | 46386797  | 1442           | 14586    | 9.886  | 0.032  | 3401           | 17101 | 19.888 | -0.362 | -0.165 |
|                                 |           | <b>Std Dev</b> | 2452.65  |        |        | <b>Std Dev</b> | 2269  |        |        |        |
|                                 |           | <b>Average</b> | 14826.66 |        |        | <b>Average</b> | 15225 |        |        |        |
|                                 |           | <b>Median</b>  | 15279.50 |        |        | <b>Median</b>  | 15903 |        |        |        |
